# Supplementary material for: Choosing internal standards based on a multivariate analysis approach with ICP(TOF)MS
Source: Royal Society of Chemistry journal article supplement (doi:10.1039/b804048f), 2008-01-01
Supplement: b804048f.pdf [file b804048f.pdf]

## Supplemental Information- Regression Reports

The following data is intended for those who are familiar with multiple OLS and its limitations. A few characteristic elemental bulk properties were analyzed for statistical significance despite the lack of practical importance. Such properties include melting point, boiling point, and heat capacity; these properties were not reported in the manuscript. Please note that some properties apparently offer a negative contribution for specific elements during specific perturbations. An analysis of these trends is beyond the scope of the current manuscript.

### Pump Rate

<sup>7</sup>Li

#### Summary of Fit

|                            |          |
|----------------------------|----------|
| RSquare                    | 0.692627 |
| RSquare Adj                | 0.682493 |
| Root Mean Square Error     | 0.294342 |
| Mean of Response           | 2.697343 |
| Observations (or Sum Wgts) | 95       |

#### Parameter Estimates

| Term                | Estimate  | Std Error | t Ratio | Prob> t | VIF       |
|---------------------|-----------|-----------|---------|---------|-----------|
| Intercept           | 0.4690935 | 0.27402   | 1.71    | 0.0903  | .         |
| InMass              | 0.7947333 | 0.06853   | 11.60   | <.0001  | 3.1692281 |
| InMelting Point (C) | 0.1098943 | 0.02966   | 3.71    | 0.0004  | 1.2266486 |
| InS (J/Kmol)        | -0.59386  | 0.121312  | -4.90   | <.0001  | 3.3094129 |

<sup>9</sup>Be

#### Summary of Fit

|                            |          |
|----------------------------|----------|
| RSquare                    | 0.501738 |
| RSquare Adj                | 0.485836 |
| Root Mean Square Error     | 0.458495 |
| Mean of Response           | 2.215474 |
| Observations (or Sum Wgts) | 98       |

#### Parameter Estimates

| Term                     | Estimate  | Std Error | t Ratio | Prob> t |
|--------------------------|-----------|-----------|---------|---------|
| Intercept                | 1.7671503 | 0.760815  | 2.32    | 0.0224  |
| InMass                   | 0.747607  | 0.100985  | 7.40    | <.0001  |
| InHeat Capacity (J/molK) | -0.666223 | 0.308979  | -2.16   | 0.0336  |
| InS (J/Kmol)             | -0.393815 | 0.176536  | -2.23   | 0.0281  |

<sup>11</sup>B

#### Summary of Fit

|                            |          |
|----------------------------|----------|
| RSquare                    | 0.52898  |
| RSquare Adj                | 0.513947 |
| Root Mean Square Error     | 0.411119 |
| Mean of Response           | 2.215083 |
| Observations (or Sum Wgts) | 98       |

#### Parameter Estimates

| Term                            | Estimate  | Std Error | t Ratio | Prob> t |
|---------------------------------|-----------|-----------|---------|---------|
| Intercept                       | 1.6446892 | 0.805913  | 2.04    | 0.0441  |
| InMass                          | 0.5831159 | 0.062588  | 9.32    | <.0001  |
| In2nd ionization potential (eV) | 0.2190636 | 0.080638  | 2.72    | 0.0079  |
| InHeat Capacity (J/molK)        | -0.947467 | 0.338281  | -2.80   | 0.0062  |

<sup>26</sup>Mg

**Summary of Fit**

RSquare 0.500967  
 RSquare Adj 0.484694  
 Root Mean Square Error 0.445634  
 Mean of Response 2.341783  
 Observations (or Sum Wgts) 96

**Parameter Estimates**

| Term                | Estimate  | Std Error | t Ratio | Prob> t |
|---------------------|-----------|-----------|---------|---------|
| Intercept           | -0.554099 | 0.438841  | -1.26   | 0.2099  |
| InMass              | 0.5371449 | 0.05764   | 9.32    | <.0001  |
| InMelting Point (C) | -0.138878 | 0.057514  | -2.41   | 0.0177  |
| InBoiling Point (C) | 0.197184  | 0.06983   | 2.82    | 0.0058  |

<sup>27</sup>Al

**Summary of Fit**

RSquare 0.589585  
 RSquare Adj 0.567035  
 Root Mean Square Error 0.363778  
 Mean of Response 2.977886  
 Observations (or Sum Wgts) 97

**Parameter Estimates**

| Term                            | Estimate  | Std Error | t Ratio | Prob> t | VIF       |
|---------------------------------|-----------|-----------|---------|---------|-----------|
| Intercept                       | 1.0351753 | 0.328165  | 3.15    | 0.0022  | .         |
| InMass                          | 0.436183  | 0.04379   | 9.96    | <.0001  | 1.2453944 |
| In2nd ionization potential (eV) | 0.070141  | 0.030658  | 2.29    | 0.0245  | 1.2824286 |
| InMelting Point (C)             | -0.11838  | 0.03634   | -3.26   | 0.0016  | 1.3790031 |
| InBoiling Point (C)             | 0.0717119 | 0.041728  | 1.72    | 0.0891  | 1.0840433 |
| InElectronegativity             | -0.125252 | 0.042173  | -2.97   | 0.0038  | 1.5424197 |

<sup>44</sup>Ca

**Summary of Fit**

RSquare 0.644481  
 RSquare Adj 0.625159  
 Root Mean Square Error 0.272845  
 Mean of Response 3.217824  
 Observations (or Sum Wgts) 98

**Parameter Estimates**

| Term                            | Estimate  | Std Error | t Ratio | Prob> t |
|---------------------------------|-----------|-----------|---------|---------|
| Intercept                       | -0.250324 | 0.827266  | -0.30   | 0.7629  |
| InMass                          | 0.3258577 | 0.029705  | 10.97   | <.0001  |
| In1st ionization potential (eV) | 0.0526454 | 0.023568  | 2.23    | 0.0279  |
| In2nd ionization potential (eV) | -0.089321 | 0.028567  | -3.13   | 0.0024  |
| InMelting Point (C)             | 0.0708113 | 0.028108  | 2.52    | 0.0135  |
| Inion mobility (C/Pa*s*A)       | -0.055779 | 0.024828  | -2.25   | 0.0271  |

<sup>45</sup>Sc

**Summary of Fit**

RSquare 0.397499  
 RSquare Adj 0.391223  
 Root Mean Square Error 0.575652  
 Mean of Response 2.092009  
 Observations (or Sum Wgts) 98

**Parameter Estimates**

| Term      | Estimate  | Std Error | t Ratio | Prob> t |
|-----------|-----------|-----------|---------|---------|
| Intercept | 0.1708488 | 0.248306  | 0.69    | 0.4931  |
| InMass    | 0.4687069 | 0.058895  | 7.96    | <.0001  |

<sup>48</sup>Ti

### Summary of Fit

|                            |          |
|----------------------------|----------|
| RSquare                    | 0.463638 |
| RSquare Adj                | 0.44652  |
| Root Mean Square Error     | 0.518968 |
| Mean of Response           | 2.055177 |
| Observations (or Sum Wgts) | 98       |

### Parameter Estimates

| Term                            | Estimate  | Std Error | t Ratio | Prob> t |
|---------------------------------|-----------|-----------|---------|---------|
| Intercept                       | -0.015165 | 0.236725  | -0.06   | 0.9491  |
| InMass                          | 0.4378934 | 0.05304   | 8.26    | <.0001  |
| In1st ionization potential (eV) | -0.109212 | 0.047752  | -2.29   | 0.0244  |
| In2nd ionization potential (eV) | 0.2305646 | 0.072609  | 3.18    | 0.0020  |

<sup>51</sup>V

### Summary of Fit

|                            |          |
|----------------------------|----------|
| RSquare                    | 0.277963 |
| RSquare Adj                | 0.2626   |
| Root Mean Square Error     | 0.553386 |
| Mean of Response           | 2.001378 |
| Observations (or Sum Wgts) | 97       |

### Parameter Estimates

| Term                | Estimate  | Std Error | t Ratio | Prob> t |
|---------------------|-----------|-----------|---------|---------|
| Intercept           | 0.7577774 | 0.216683  | 3.50    | 0.0007  |
| InMass              | 0.265903  | 0.053094  | 5.01    | <.0001  |
| InElectronegativity | -0.091347 | 0.045026  | -2.03   | 0.0453  |

<sup>52</sup>Cr

### Summary of Fit

|                            |          |
|----------------------------|----------|
| RSquare                    | 0.593488 |
| RSquare Adj                | 0.575814 |
| Root Mean Square Error     | 0.369177 |
| Mean of Response           | 2.945283 |
| Observations (or Sum Wgts) | 97       |

### Parameter Estimates

| Term                            | Estimate  | Std Error | t Ratio | Prob> t |
|---------------------------------|-----------|-----------|---------|---------|
| Intercept                       | 4.3820235 | 1.085072  | 4.04    | 0.0001  |
| InMass                          | 0.4125891 | 0.037666  | 10.95   | <.0001  |
| In1st ionization potential (eV) | -0.164687 | 0.046177  | -3.57   | 0.0006  |
| InElectronegativity             | -0.073338 | 0.037285  | -1.97   | 0.0522  |
| Inion mobility (C/Pa*s*A)       | 0.102478  | 0.034419  | 2.98    | 0.0037  |

<sup>55</sup>Mn

### Summary of Fit

|                            |          |
|----------------------------|----------|
| RSquare                    | 0.739158 |
| RSquare Adj                | 0.708211 |
| Root Mean Square Error     | 0.393878 |
| Mean of Response           | 2.195843 |
| Observations (or Sum Wgts) | 67       |

### Parameter Estimates

| Term                            | Estimate  | Std Error | t Ratio | Prob> t |
|---------------------------------|-----------|-----------|---------|---------|
| Intercept                       | 0.1192258 | 0.499211  | 0.24    | 0.8121  |
| InMass                          | 0.5768688 | 0.055388  | 10.41   | <.0001  |
| In1st ionization potential (eV) | 0.1639229 | 0.065374  | 2.51    | 0.0149  |
| In2nd ionization potential (eV) | -0.150422 | 0.058728  | -2.56   | 0.0130  |
| InMelting Point (C)             | -0.212632 | 0.077886  | -2.73   | 0.0083  |
| InG of form (kJ/mol)            | 0.1426783 | 0.040739  | 3.50    | 0.0009  |
| InElectronegativity             | -0.489343 | 0.07464   | -6.56   | <.0001  |

<sup>57</sup>Fe

### Summary of Fit

|                            |          |
|----------------------------|----------|
| RSquare                    | 0.655148 |
| RSquare Adj                | 0.627716 |
| Root Mean Square Error     | 0.37151  |
| Mean of Response           | 2.467621 |
| Observations (or Sum Wgts) | 96       |

### Parameter Estimates

| Term                            | Estimate  | Std Error | t Ratio | Prob> t |
|---------------------------------|-----------|-----------|---------|---------|
| Intercept                       | 0.9170318 | 0.223151  | 4.11    | <.0001  |
| InMass                          | 0.4309557 | 0.038104  | 11.31   | <.0001  |
| In1st ionization potential (eV) | -0.133942 | 0.050187  | -2.67   | 0.0091  |
| In2nd ionization potential (eV) | 0.0821454 | 0.04333   | 1.90    | 0.0613  |
| InMelting Point (C)             | -0.057793 | 0.028737  | -2.01   | 0.0474  |
| InHeat Capacity (J/molK)        | 0.1300328 | 0.04162   | 3.12    | 0.0024  |
| InS (J/Kmol)                    | -0.099067 | 0.031442  | -3.15   | 0.0022  |
| InElectronegativity             | -0.232461 | 0.056247  | -4.13   | <.0001  |

<sup>58</sup>Ni

### Summary of Fit

|                            |          |
|----------------------------|----------|
| RSquare                    | 0.690171 |
| RSquare Adj                | 0.665242 |
| Root Mean Square Error     | 0.336548 |
| Mean of Response           | 2.812905 |
| Observations (or Sum Wgts) | 95       |

### Parameter Estimates

| Term                      | Estimate  | Std Error | t Ratio | Prob> t |
|---------------------------|-----------|-----------|---------|---------|
| Intercept                 | -0.344914 | 0.880085  | -0.39   | 0.6961  |
| InMass                    | 0.4615725 | 0.037715  | 12.24   | <.0001  |
| InMelting Point (C)       | -0.178588 | 0.054479  | -3.28   | 0.0015  |
| InHeat Capacity (J/molK)  | -0.066427 | 0.032038  | -2.07   | 0.0411  |
| InH of form (kJ/mol)      | 0.1088107 | 0.058162  | 1.87    | 0.0647  |
| InS (J/Kmol)              | -0.101247 | 0.030795  | -3.29   | 0.0015  |
| InElectronegativity       | -0.178241 | 0.052154  | -3.42   | 0.0010  |
| Inion mobility (C/Pa*s*A) | -0.058502 | 0.024944  | -2.35   | 0.0213  |

<sup>59</sup>Co

### Summary of Fit

|                            |          |
|----------------------------|----------|
| RSquare                    | 0.388702 |
| RSquare Adj                | 0.338595 |
| Root Mean Square Error     | 0.559458 |
| Mean of Response           | 1.895937 |
| Observations (or Sum Wgts) | 67       |

### Parameter Estimates

| Term                            | Estimate  | Std Error | t Ratio | Prob> t |
|---------------------------------|-----------|-----------|---------|---------|
| Intercept                       | 0.2466702 | 0.318832  | 0.77    | 0.4421  |
| InMass                          | 0.4100774 | 0.087511  | 4.69    | <.0001  |
| In2nd ionization potential (eV) | -0.144508 | 0.077986  | -1.85   | 0.0687  |
| InHeat Capacity (J/molK)        | -0.206887 | 0.067682  | -3.06   | 0.0033  |
| InS (J/Kmol)                    | 0.1776771 | 0.062038  | 2.86    | 0.0057  |
| InCharge                        | -0.48338  | 0.244997  | -1.97   | 0.0530  |

<sup>63</sup>Cu

### Summary of Fit

|                            |          |
|----------------------------|----------|
| RSquare                    | 0.620116 |
| RSquare Adj                | 0.567718 |
| Root Mean Square Error     | 0.11502  |
| Mean of Response           | 2.559986 |
| Observations (or Sum Wgts) | 67       |

### Parameter Estimates

| Term | Estimate | Std Error | t Ratio | Prob> t |
|------|----------|-----------|---------|---------|
|------|----------|-----------|---------|---------|

Supplementary Material (ESI) for Journal of Analytical Atomic Spectrometry  
This journal is © The Royal Society of Chemistry 2008

| Term                            | Estimate  | Std Error | t Ratio | Prob> t |
|---------------------------------|-----------|-----------|---------|---------|
| Intercept                       | 5.3954625 | 0.781771  | 6.90    | <.0001  |
| lnMass                          | 0.0951125 | 0.022568  | 4.21    | <.0001  |
| ln1st ionization potential (eV) | 0.0960194 | 0.023295  | 4.12    | 0.0001  |
| lnBoiling Point (C)             | -0.083949 | 0.027028  | -3.11   | 0.0029  |
| lnHeat Capacity (J/molK)        | -0.136413 | 0.019325  | -7.06   | <.0001  |
| lnG of form (kJ/mol)            | 0.0541865 | 0.028835  | 1.88    | 0.0652  |
| lnS (J/Kmol)                    | 0.0518719 | 0.019843  | 2.61    | 0.0114  |
| Inion mobility (C/Pa*s*A)       | 0.0919091 | 0.025239  | 3.64    | 0.0006  |
| lnCharge                        | -0.230971 | 0.06705   | -3.44   | 0.0011  |

<sup>64</sup>Zn

**Summary of Fit**

|                            |          |
|----------------------------|----------|
| RSquare                    | 0.248711 |
| RSquare Adj                | 0.224476 |
| Root Mean Square Error     | 0.434065 |
| Mean of Response           | 2.075978 |
| Observations (or Sum Wgts) | 97       |

**Parameter Estimates**

| Term                | Estimate  | Std Error | t Ratio | Prob> t |
|---------------------|-----------|-----------|---------|---------|
| Intercept           | 0.4415842 | 0.362694  | 1.22    | 0.2265  |
| lnMass              | 0.2091927 | 0.042444  | 4.93    | <.0001  |
| lnMelting Point (C) | 0.0928639 | 0.04481   | 2.07    | 0.0410  |
| lnElectronegativity | -0.165009 | 0.054446  | -3.03   | 0.0032  |

<sup>69</sup>Ga

**Summary of Fit**

|                            |          |
|----------------------------|----------|
| RSquare                    | 0.547916 |
| RSquare Adj                | 0.522518 |
| Root Mean Square Error     | 0.469593 |
| Mean of Response           | 2.145815 |
| Observations (or Sum Wgts) | 95       |

**Parameter Estimates**

| Term                            | Estimate  | Std Error | t Ratio | Prob> t |
|---------------------------------|-----------|-----------|---------|---------|
| Intercept                       | 7.9946893 | 2.507729  | 3.19    | 0.0020  |
| lnMass                          | 0.4502526 | 0.057229  | 7.87    | <.0001  |
| ln1st ionization potential (eV) | -0.203327 | 0.055848  | -3.64   | 0.0005  |
| lnG of form (kJ/mol)            | 0.1108988 | 0.050704  | 2.19    | 0.0314  |
| lnElectronegativity             | -0.434207 | 0.089855  | -4.83   | <.0001  |
| Inion mobility (C/Pa*s*A)       | 0.2705695 | 0.077849  | 3.48    | 0.0008  |

<sup>75</sup>As

**Summary of Fit**

|                            |          |
|----------------------------|----------|
| RSquare                    | 0.644025 |
| RSquare Adj                | 0.61436  |
| Root Mean Square Error     | 0.346273 |
| Mean of Response           | 2.500204 |
| Observations (or Sum Wgts) | 79       |

**Parameter Estimates**

| Term                            | Estimate  | Std Error | t Ratio | Prob> t |
|---------------------------------|-----------|-----------|---------|---------|
| Intercept                       | -36.30026 | 5.544715  | -6.55   | <.0001  |
| lnMass                          | 0.2153396 | 0.055748  | 3.86    | 0.0002  |
| ln1st ionization potential (eV) | -0.233045 | 0.081373  | -2.86   | 0.0055  |
| lnBoiling Point (C)             | 0.2056854 | 0.063005  | 3.26    | 0.0017  |
| lnHeat Capacity (J/molK)        | 0.0923889 | 0.046647  | 1.98    | 0.0515  |
| Inion mobility (C/Pa*s*A)       | -1.136821 | 0.168249  | -6.76   | <.0001  |
| lnCharge                        | 1.3622586 | 0.226102  | 6.02    | <.0001  |

<sup>76</sup>Se

### Summary of Fit

|                            |          |
|----------------------------|----------|
| RSquare                    | 0.653766 |
| RSquare Adj                | 0.619631 |
| Root Mean Square Error     | 0.396365 |
| Mean of Response           | 2.236124 |
| Observations (or Sum Wgts) | 79       |

### Parameter Estimates

| Term                            | Estimate  | Std Error | t Ratio | Prob> t | VIF       |
|---------------------------------|-----------|-----------|---------|---------|-----------|
| Intercept                       | -41.93518 | 5.887083  | -7.12   | <.0001  | .         |
| InMass                          | 0.2672403 | 0.069048  | 3.87    | 0.0002  | 1.6393374 |
| In2nd ionization potential (eV) | -0.119617 | 0.053754  | -2.23   | 0.0292  | 1.1460819 |
| InBoiling Point (C)             | 0.12701   | 0.047672  | 2.66    | 0.0095  | 1.676703  |
| InHeat Capacity (J/molK)        | 0.077817  | 0.029536  | 2.63    | 0.0103  | 1.4593541 |
| InH of form (kJ/mol)            | 0.126734  | 0.056033  | 2.26    | 0.0268  | 1.3466913 |
| Inion mobility (C/Pa*s*A)       | -1.294653 | 0.179494  | -7.21   | <.0001  | 4.8152094 |
| InCharge                        | 1.6631639 | 0.252142  | 6.60    | <.0001  | 4.1311528 |

<sup>85</sup>Rb

### Summary of Fit

|                            |          |
|----------------------------|----------|
| RSquare                    | 0.545809 |
| RSquare Adj                | 0.526274 |
| Root Mean Square Error     | 0.434708 |
| Mean of Response           | 1.926489 |
| Observations (or Sum Wgts) | 98       |

### Parameter Estimates

| Term                      | Estimate  | Std Error | t Ratio | Prob> t |
|---------------------------|-----------|-----------|---------|---------|
| Intercept                 | -3.654415 | 1.637146  | -2.23   | 0.0280  |
| InMass                    | 0.500754  | 0.051349  | 9.75    | <.0001  |
| InMelting Point (C)       | 0.0610134 | 0.036328  | 1.68    | 0.0964  |
| InElectronegativity       | 0.1058753 | 0.060136  | 1.76    | 0.0816  |
| Inion mobility (C/Pa*s*A) | -0.106296 | 0.051141  | -2.08   | 0.0404  |

<sup>88</sup>Sr

### Summary of Fit

|                            |          |
|----------------------------|----------|
| RSquare                    | 0.545796 |
| RSquare Adj                | 0.536234 |
| Root Mean Square Error     | 0.459879 |
| Mean of Response           | 1.800293 |
| Observations (or Sum Wgts) | 98       |

### Parameter Estimates

| Term                            | Estimate  | Std Error | t Ratio | Prob> t |
|---------------------------------|-----------|-----------|---------|---------|
| Intercept                       | -0.16004  | 0.189706  | -0.84   | 0.4010  |
| InMass                          | 0.506369  | 0.047763  | 10.60   | <.0001  |
| In2nd ionization potential (eV) | 0.0651953 | 0.03079   | 2.12    | 0.0368  |

<sup>89</sup>Y

### Summary of Fit

|                            |          |
|----------------------------|----------|
| RSquare                    | 0.606183 |
| RSquare Adj                | 0.553674 |
| Root Mean Square Error     | 0.552744 |
| Mean of Response           | 1.631281 |
| Observations (or Sum Wgts) | 69       |

### Parameter Estimates

| Term                            | Estimate  | Std Error | t Ratio | Prob> t |
|---------------------------------|-----------|-----------|---------|---------|
| Intercept                       | -9.752629 | 4.086335  | -2.39   | 0.0202  |
| InMass                          | 0.5438606 | 0.069293  | 7.85    | <.0001  |
| In1st ionization potential (eV) | -0.471422 | 0.164249  | -2.87   | 0.0057  |
| InMelting Point (C)             | -0.318779 | 0.10133   | -3.15   | 0.0026  |
| InBoiling Point (C)             | 0.5178975 | 0.147015  | 3.52    | 0.0008  |
| InS (J/Kmol)                    | 0.146147  | 0.062762  | 2.33    | 0.0233  |

Supplementary Material (ESI) for Journal of Analytical Atomic Spectrometry  
 This journal is © The Royal Society of Chemistry 2008

| Term                      | Estimate  | Std Error | t Ratio | Prob> t |
|---------------------------|-----------|-----------|---------|---------|
| InElectronegativity       | 0.2940682 | 0.152369  | 1.93    | 0.0583  |
| Inion mobility (C/Pa*s*A) | -0.24629  | 0.114133  | -2.16   | 0.0349  |
| InCharge                  | 0.6852273 | 0.207357  | 3.30    | 0.0016  |

<sup>90</sup>Zr

**Summary of Fit**

|                            |          |
|----------------------------|----------|
| RSquare                    | 0.572493 |
| RSquare Adj                | 0.563199 |
| Root Mean Square Error     | 0.450295 |
| Mean of Response           | 1.805849 |
| Observations (or Sum Wgts) | 95       |

**Parameter Estimates**

| Term                            | Estimate  | Std Error | t Ratio | Prob> t |
|---------------------------------|-----------|-----------|---------|---------|
| Intercept                       | -0.502897 | 0.213427  | -2.36   | 0.0206  |
| InMass                          | 0.5512677 | 0.051951  | 10.61   | <.0001  |
| In2nd ionization potential (eV) | 0.1743136 | 0.056897  | 3.06    | 0.0029  |

<sup>102</sup>Ru

**Summary of Fit**

|                            |          |
|----------------------------|----------|
| RSquare                    | 0.652355 |
| RSquare Adj                | 0.632824 |
| Root Mean Square Error     | 0.474696 |
| Mean of Response           | 1.641411 |
| Observations (or Sum Wgts) | 95       |

**Parameter Estimates**

| Term                            | Estimate  | Std Error | t Ratio | Prob> t |
|---------------------------------|-----------|-----------|---------|---------|
| Intercept                       | 0.7255161 | 0.560043  | 1.30    | 0.1985  |
| InMass                          | 0.5550982 | 0.053436  | 10.39   | <.0001  |
| In2nd ionization potential (eV) | 0.0966099 | 0.04461   | 2.17    | 0.0330  |
| InMelting Point (C)             | -0.332627 | 0.145797  | -2.28   | 0.0249  |
| InHeat Capacity (J/molK)        | -0.368913 | 0.061719  | -5.98   | <.0001  |
| IndH of form (kJ/mol)           | 0.2362419 | 0.126945  | 1.86    | 0.0660  |

<sup>103</sup>Rh

**Summary of Fit**

|                            |          |
|----------------------------|----------|
| RSquare                    | 0.597394 |
| RSquare Adj                | 0.559051 |
| Root Mean Square Error     | 0.582429 |
| Mean of Response           | 1.55485  |
| Observations (or Sum Wgts) | 70       |

**Parameter Estimates**

| Term                            | Estimate  | Std Error | t Ratio | Prob> t |
|---------------------------------|-----------|-----------|---------|---------|
| Intercept                       | 0.7767965 | 0.554932  | 1.40    | 0.1665  |
| InMass                          | 0.6121641 | 0.066054  | 9.27    | <.0001  |
| In1st ionization potential (eV) | -0.117008 | 0.059611  | -1.96   | 0.0541  |
| In2nd ionization potential (eV) | -0.104155 | 0.056445  | -1.85   | 0.0697  |
| InMelting Point (C)             | -0.497769 | 0.184079  | -2.70   | 0.0088  |
| IndH of form (kJ/mol)           | 0.345958  | 0.169963  | 2.04    | 0.0460  |
| InCharge                        | 0.4714566 | 0.161264  | 2.92    | 0.0048  |

<sup>106</sup>Pd

**Summary of Fit**

|                            |          |
|----------------------------|----------|
| RSquare                    | 0.728071 |
| RSquare Adj                | 0.709446 |
| Root Mean Square Error     | 0.305738 |
| Mean of Response           | 1.724263 |
| Observations (or Sum Wgts) | 79       |

### Parameter Estimates

| Term                      | Estimate  | Std Error | t Ratio | Prob> t |
|---------------------------|-----------|-----------|---------|---------|
| Intercept                 | 17.95529  | 3.592337  | 5.00    | <.0001  |
| InMass                    | 0.4316235 | 0.035611  | 12.12   | <.0001  |
| InHeat Capacity (J/molK)  | -0.117998 | 0.029127  | -4.05   | 0.0001  |
| IndG of form (kJ/mol)     | -0.110103 | 0.040959  | -2.69   | 0.0089  |
| Inion mobility (C/Pa*s*A) | 0.5260513 | 0.112618  | 4.67    | <.0001  |
| InCharge                  | -0.917602 | 0.167183  | -5.49   | <.0001  |

<sup>109</sup>Ag

### Summary of Fit

|                            |          |
|----------------------------|----------|
| RSquare                    | 0.512929 |
| RSquare Adj                | 0.482863 |
| Root Mean Square Error     | 0.569183 |
| Mean of Response           | 1.639205 |
| Observations (or Sum Wgts) | 87       |

### Parameter Estimates

| Term                      | Estimate  | Std Error | t Ratio | Prob> t |
|---------------------------|-----------|-----------|---------|---------|
| Intercept                 | 19.797935 | 4.595709  | 4.31    | <.0001  |
| InMass                    | 0.4389462 | 0.070269  | 6.25    | <.0001  |
| InHeat Capacity (J/molK)  | -0.115726 | 0.040247  | -2.88   | 0.0052  |
| InElectronegativity       | -0.112096 | 0.060961  | -1.84   | 0.0696  |
| Inion mobility (C/Pa*s*A) | 0.6200781 | 0.142302  | 4.36    | <.0001  |
| InCharge                  | -1.050365 | 0.235003  | -4.47   | <.0001  |

<sup>114</sup>Cd

### Summary of Fit

|                            |          |
|----------------------------|----------|
| RSquare                    | 0.705873 |
| RSquare Adj                | 0.689712 |
| Root Mean Square Error     | 0.428231 |
| Mean of Response           | 1.604357 |
| Observations (or Sum Wgts) | 97       |

### Parameter Estimates

| Term                     | Estimate  | Std Error | t Ratio | Prob> t |
|--------------------------|-----------|-----------|---------|---------|
| Intercept                | -0.52412  | 0.39235   | -1.34   | 0.1849  |
| InMass                   | 0.7213756 | 0.053961  | 13.37   | <.0001  |
| InBoiling Point (C)      | -0.400707 | 0.100348  | -3.99   | 0.0001  |
| InHeat Capacity (J/molK) | -0.10387  | 0.036047  | -2.88   | 0.0049  |
| IndG of form (kJ/mol)    | 0.5325453 | 0.104566  | 5.09    | <.0001  |
| InS (J/Kmol)             | -0.162564 | 0.052714  | -3.08   | 0.0027  |

<sup>115</sup>In

### Summary of Fit

|                            |          |
|----------------------------|----------|
| RSquare                    | 0.46196  |
| RSquare Adj                | 0.456355 |
| Root Mean Square Error     | 0.6061   |
| Mean of Response           | 1.546286 |
| Observations (or Sum Wgts) | 98       |

### Parameter Estimates

| Term      | Estimate  | Std Error | t Ratio | Prob> t |
|-----------|-----------|-----------|---------|---------|
| Intercept | -0.570832 | 0.241096  | -2.37   | 0.0199  |
| InMass    | 0.5863751 | 0.064587  | 9.08    | <.0001  |

<sup>120</sup>Sn

### Summary of Fit

|                        |          |
|------------------------|----------|
| RSquare                | 0.751835 |
| RSquare Adj            | 0.736516 |
| Root Mean Square Error | 0.345318 |
| Mean of Response       | 1.755163 |



Supplementary Material (ESI) for Journal of Analytical Atomic Spectrometry  
 This journal is © The Royal Society of Chemistry 2008

|                                 |           |           |         |         |
|---------------------------------|-----------|-----------|---------|---------|
| Observations (or Sum Wgts)      | 87        |           |         |         |
| <b>Parameter Estimates</b>      |           |           |         |         |
| Term                            | Estimate  | Std Error | t Ratio | Prob> t |
| Intercept                       | -4.298995 | 1.435253  | -3.00   | 0.0036  |
| InMass                          | 0.5815646 | 0.043676  | 13.32   | <.0001  |
| In1st ionization potential (eV) | 0.1114397 | 0.030852  | 3.61    | 0.0005  |
| InElectronegativity             | -0.167933 | 0.046302  | -3.63   | 0.0005  |
| Inion mobility (C/Pa*s*A)       | -0.113353 | 0.0458    | -2.47   | 0.0154  |
| InCharge                        | 0.2863774 | 0.083487  | 3.43    | 0.0010  |

<sup>121</sup>Sb

**Summary of Fit**

|                            |          |
|----------------------------|----------|
| RSquare                    | 0.785487 |
| RSquare Adj                | 0.767101 |
| Root Mean Square Error     | 0.378316 |
| Mean of Response           | 1.479579 |
| Observations (or Sum Wgts) | 77       |

**Parameter Estimates**

|                                 |           |           |         |         |
|---------------------------------|-----------|-----------|---------|---------|
| Term                            | Estimate  | Std Error | t Ratio | Prob> t |
| Intercept                       | 7.0269111 | 2.714531  | 2.59    | 0.0117  |
| InMass                          | 0.69835   | 0.047325  | 14.76   | <.0001  |
| In1st ionization potential (eV) | 0.3411119 | 0.105299  | 3.24    | 0.0018  |
| IndH of form (kJ/mol)           | -0.122959 | 0.063407  | -1.94   | 0.0565  |
| InS (J/Kmol)                    | 0.0871876 | 0.039884  | 2.19    | 0.0322  |
| InElectronegativity             | -0.467015 | 0.088769  | -5.26   | <.0001  |
| Inion mobility (C/Pa*s*A)       | 0.2631621 | 0.084024  | 3.13    | 0.0025  |

<sup>130</sup>Te

**Summary of Fit**

|                            |          |
|----------------------------|----------|
| RSquare                    | 0.72799  |
| RSquare Adj                | 0.712535 |
| Root Mean Square Error     | 0.363389 |
| Mean of Response           | 1.675089 |
| Observations (or Sum Wgts) | 94       |

**Parameter Estimates**

|                                 |           |           |         |         |
|---------------------------------|-----------|-----------|---------|---------|
| Term                            | Estimate  | Std Error | t Ratio | Prob> t |
| Intercept                       | 1.8862719 | 1.352704  | 1.39    | 0.1667  |
| InMass                          | 0.717522  | 0.049574  | 14.47   | <.0001  |
| In2nd ionization potential (eV) | 0.0620687 | 0.027925  | 2.22    | 0.0288  |
| InHeat Capacity (J/molK)        | 0.0938998 | 0.044305  | 2.12    | 0.0369  |
| InElectronegativity             | -0.270033 | 0.093095  | -2.90   | 0.0047  |
| Inion mobility (C/Pa*s*A)       | 0.0952565 | 0.043081  | 2.21    | 0.0296  |

<sup>133</sup>Cs

**Summary of Fit**

|                            |          |
|----------------------------|----------|
| RSquare                    | 0.660281 |
| RSquare Adj                | 0.656743 |
| Root Mean Square Error     | 0.47538  |
| Mean of Response           | 1.567039 |
| Observations (or Sum Wgts) | 98       |

**Parameter Estimates**

|           |           |           |         |         |
|-----------|-----------|-----------|---------|---------|
| Term      | Estimate  | Std Error | t Ratio | Prob> t |
| Intercept | -1.197786 | 0.208026  | -5.76   | <.0001  |
| InMass    | 0.7575809 | 0.055461  | 13.66   | <.0001  |

<sup>138</sup>Ba

**Summary of Fit**

|         |          |
|---------|----------|
| RSquare | 0.637788 |
|---------|----------|

Supplementary Material (ESI) for Journal of Analytical Atomic Spectrometry  
 This journal is © The Royal Society of Chemistry 2008

RSquare Adj 0.629914  
 Root Mean Square Error 0.485508  
 Mean of Response 1.594636  
 Observations (or Sum Wgts) 95

**Parameter Estimates**

| Term         | Estimate  | Std Error | t Ratio | Prob> t |
|--------------|-----------|-----------|---------|---------|
| Intercept    | -1.611588 | 0.27074   | -5.95   | <.0001  |
| InMass       | 0.7954542 | 0.06304   | 12.62   | <.0001  |
| InS (J/Kmol) | 0.1120345 | 0.054218  | 2.07    | 0.0416  |

<sup>140</sup>Ce

**Summary of Fit**

RSquare 0.657081  
 RSquare Adj 0.641494  
 Root Mean Square Error 0.417238  
 Mean of Response 1.688822  
 Observations (or Sum Wgts) 70

**Parameter Estimates**

| Term                            | Estimate  | Std Error | t Ratio | Prob> t |
|---------------------------------|-----------|-----------|---------|---------|
| Intercept                       | -0.918683 | 0.237544  | -3.87   | 0.0003  |
| InMass                          | 0.6931098 | 0.063899  | 10.85   | <.0001  |
| In1st ionization potential (eV) | -0.148682 | 0.073484  | -2.02   | 0.0471  |
| InCharge                        | 0.2790036 | 0.106589  | 2.62    | 0.0110  |

<sup>152</sup>Sm

**Summary of Fit**

RSquare 0.609988  
 RSquare Adj 0.579518  
 Root Mean Square Error 0.386437  
 Mean of Response 1.785802  
 Observations (or Sum Wgts) 70

**Parameter Estimates**

| Term                            | Estimate  | Std Error | t Ratio | Prob> t |
|---------------------------------|-----------|-----------|---------|---------|
| Intercept                       | -1.355655 | 0.514258  | -2.64   | 0.0105  |
| InMass                          | 0.7606228 | 0.091406  | 8.32    | <.0001  |
| In1st ionization potential (eV) | -0.112227 | 0.065395  | -1.72   | 0.0910  |
| InMelting Point (C)             | -0.095266 | 0.048552  | -1.96   | 0.0541  |
| InBoiling Point (C)             | 0.1066621 | 0.048562  | 2.20    | 0.0317  |
| InCharge                        | 0.303288  | 0.103856  | 2.92    | 0.0048  |

<sup>153</sup>Eu

**Summary of Fit**

RSquare 0.605971  
 RSquare Adj 0.581723  
 Root Mean Square Error 0.395233  
 Mean of Response 1.752594  
 Observations (or Sum Wgts) 70

**Parameter Estimates**

| Term                | Estimate  | Std Error | t Ratio | Prob> t |
|---------------------|-----------|-----------|---------|---------|
| Intercept           | -1.814327 | 0.472737  | -3.84   | 0.0003  |
| InMass              | 0.8301402 | 0.089256  | 9.30    | <.0001  |
| InMelting Point (C) | -0.100567 | 0.054548  | -1.84   | 0.0698  |
| InBoiling Point (C) | 0.1221485 | 0.050952  | 2.40    | 0.0194  |
| InCharge            | 0.3043065 | 0.098532  | 3.09    | 0.0030  |

<sup>159</sup>Tb

**Summary of Fit**

RSquare 0.55786

Supplementary Material (ESI) for Journal of Analytical Atomic Spectrometry  
 This journal is © The Royal Society of Chemistry 2008

RSquare Adj 0.530651  
 Root Mean Square Error 0.521616  
 Mean of Response 1.781274  
 Observations (or Sum Wgts) 70

**Parameter Estimates**

| Term                            | Estimate  | Std Error | t Ratio | Prob> t |
|---------------------------------|-----------|-----------|---------|---------|
| Intercept                       | -1.369913 | 0.52739   | -2.60   | 0.0116  |
| InMass                          | 0.9302625 | 0.115782  | 8.03    | <.0001  |
| In1st ionization potential (eV) | -0.455415 | 0.132949  | -3.43   | 0.0011  |
| InElectronegativity             | 0.3405728 | 0.114438  | 2.98    | 0.0041  |
| InCharge                        | 0.4206832 | 0.141332  | 2.98    | 0.0041  |

*<sup>166</sup>Er*

**Summary of Fit**

RSquare 0.633992  
 RSquare Adj 0.599134  
 Root Mean Square Error 0.459819  
 Mean of Response 1.798961  
 Observations (or Sum Wgts) 70

**Parameter Estimates**

| Term                            | Estimate  | Std Error | t Ratio | Prob> t |
|---------------------------------|-----------|-----------|---------|---------|
| Intercept                       | -1.849498 | 0.647178  | -2.86   | 0.0058  |
| InMass                          | 0.8309567 | 0.097068  | 8.56    | <.0001  |
| In1st ionization potential (eV) | -0.282391 | 0.094854  | -2.98   | 0.0041  |
| In2nd ionization potential (eV) | 0.1653063 | 0.089347  | 1.85    | 0.0690  |
| InMelting Point (C)             | 0.2003149 | 0.082166  | 2.44    | 0.0176  |
| InBoiling Point (C)             | -0.172985 | 0.071606  | -2.42   | 0.0186  |
| InCharge                        | 0.4309325 | 0.136261  | 3.16    | 0.0024  |

*<sup>178</sup>Hf*

**Summary of Fit**

RSquare 0.625168  
 RSquare Adj 0.606884  
 Root Mean Square Error 0.601291  
 Mean of Response 1.703779  
 Observations (or Sum Wgts) 87

**Parameter Estimates**

| Term                            | Estimate  | Std Error | t Ratio | Prob> t |
|---------------------------------|-----------|-----------|---------|---------|
| Intercept                       | -8.994706 | 2.732565  | -3.29   | 0.0015  |
| InMass                          | 0.7117272 | 0.07463   | 9.54    | <.0001  |
| In2nd ionization potential (eV) | 0.1441481 | 0.046703  | 3.09    | 0.0028  |
| Inion mobility (C/Pa*s*A)       | -0.239042 | 0.088483  | -2.70   | 0.0084  |
| InCharge                        | 0.5781889 | 0.144809  | 3.99    | 0.0001  |

*<sup>184</sup>W*

**Summary of Fit**

RSquare 0.786955  
 RSquare Adj 0.775119  
 Root Mean Square Error 0.321578  
 Mean of Response 1.942903  
 Observations (or Sum Wgts) 96

**Parameter Estimates**

| Term                     | Estimate  | Std Error | t Ratio | Prob> t |
|--------------------------|-----------|-----------|---------|---------|
| Intercept                | 4.1075886 | 0.608632  | 6.75    | <.0001  |
| InMass                   | 0.5326826 | 0.040813  | 13.05   | <.0001  |
| InMelting Point (C)      | -0.956597 | 0.168253  | -5.69   | <.0001  |
| InBoiling Point (C)      | 0.4360312 | 0.136158  | 3.20    | 0.0019  |
| InHeat Capacity (J/molK) | -0.144379 | 0.04325   | -3.34   | 0.0012  |
| InElectronegativity      | 0.1574498 | 0.036166  | 4.35    | <.0001  |

Supplementary Material (ESI) for Journal of Analytical Atomic Spectrometry  
 This journal is © The Royal Society of Chemistry 2008

<sup>192</sup>Os

**Summary of Fit**

|                            |          |
|----------------------------|----------|
| RSquare                    | 0.82608  |
| RSquare Adj                | 0.814168 |
| Root Mean Square Error     | 0.109223 |
| Mean of Response           | 2.839383 |
| Observations (or Sum Wgts) | 79       |

**Parameter Estimates**

| Term                            | Estimate  | Std Error | t Ratio | Prob> t |
|---------------------------------|-----------|-----------|---------|---------|
| Intercept                       | 3.5283645 | 0.774526  | 4.56    | <.0001  |
| lnMass                          | 0.2243788 | 0.015624  | 14.36   | <.0001  |
| ln1st ionization potential (eV) | 0.0468179 | 0.023525  | 1.99    | 0.0503  |
| ln2nd ionization potential (eV) | 0.1191629 | 0.047402  | 2.51    | 0.0141  |
| lnS (J/Kmol)                    | 0.0497355 | 0.017624  | 2.82    | 0.0061  |
| Inion mobility (C/Pa*s*A)       | 0.0666192 | 0.025368  | 2.63    | 0.0105  |

<sup>193</sup>Ir

**Summary of Fit**

|                            |          |
|----------------------------|----------|
| RSquare                    | 0.545462 |
| RSquare Adj                | 0.535472 |
| Root Mean Square Error     | 0.609016 |
| Mean of Response           | 1.831738 |
| Observations (or Sum Wgts) | 94       |

**Parameter Estimates**

| Term                | Estimate  | Std Error | t Ratio | Prob> t |
|---------------------|-----------|-----------|---------|---------|
| Intercept           | -0.723766 | 0.263166  | -2.75   | 0.0072  |
| lnMass              | 0.5360378 | 0.051881  | 10.33   | <.0001  |
| lnElectronegativity | -0.313659 | 0.07201   | -4.36   | <.0001  |

<sup>195</sup>Pt

**Summary of Fit**

|                            |          |
|----------------------------|----------|
| RSquare                    | 0.938762 |
| RSquare Adj                | 0.932167 |
| Root Mean Square Error     | 0.208266 |
| Mean of Response           | 1.942954 |
| Observations (or Sum Wgts) | 73       |

**Parameter Estimates**

| Term                            | Estimate  | Std Error | t Ratio | Prob> t |
|---------------------------------|-----------|-----------|---------|---------|
| Intercept                       | -2.203486 | 0.217994  | -10.11  | <.0001  |
| lnMass                          | 0.9861453 | 0.039772  | 24.80   | <.0001  |
| ln1st ionization potential (eV) | 0.0887948 | 0.034243  | 2.59    | 0.0117  |
| ln2nd ionization potential (eV) | -0.079107 | 0.029763  | -2.66   | 0.0099  |
| lnHeat Capacity (J/molK)        | -0.046843 | 0.024344  | -1.92   | 0.0587  |
| lnS (J/Kmol)                    | 0.0602882 | 0.034496  | 1.75    | 0.0852  |
| lnElectronegativity             | 0.0594845 | 0.026937  | 2.21    | 0.0308  |

<sup>197</sup>Au

**Summary of Fit**

|                            |          |
|----------------------------|----------|
| RSquare                    | 0.648483 |
| RSquare Adj                | 0.629482 |
| Root Mean Square Error     | 0.192224 |
| Mean of Response           | 2.451807 |
| Observations (or Sum Wgts) | 79       |

**Parameter Estimates**

| Term                      | Estimate  | Std Error | t Ratio | Prob> t |
|---------------------------|-----------|-----------|---------|---------|
| Intercept                 | 13.205521 | 2.691878  | 4.91    | <.0001  |
| lnMass                    | 0.1372548 | 0.024163  | 5.68    | <.0001  |
| lnG of form (kJ/mol)      | -0.053232 | 0.029868  | -1.78   | 0.0788  |
| Inion mobility (C/Pa*s*A) | 0.3382107 | 0.081842  | 4.13    | <.0001  |
| lnCharge                  | -0.558689 | 0.121357  | -4.60   | <.0001  |

<sup>202</sup>Hg

**Summary of Fit**

RSquare 0.609676  
 RSquare Adj 0.596808  
 Root Mean Square Error 0.541935  
 Mean of Response 1.766364  
 Observations (or Sum Wgts) 95

**Parameter Estimates**

| Term                            | Estimate  | Std Error | t Ratio | Prob> t |
|---------------------------------|-----------|-----------|---------|---------|
| Intercept                       | -0.166556 | 0.235138  | -0.71   | 0.4805  |
| InMass                          | 0.5315066 | 0.051606  | 10.30   | <.0001  |
| In1st ionization potential (eV) | -0.262593 | 0.130755  | -2.01   | 0.0476  |
| InHeat Capacity (J/molK)        | 0.192189  | 0.062896  | 3.06    | 0.0029  |

<sup>205</sup>Tl

**Summary of Fit**

RSquare 0.637497  
 RSquare Adj 0.629784  
 Root Mean Square Error 0.586733  
 Mean of Response 1.748681  
 Observations (or Sum Wgts) 97

**Parameter Estimates**

| Term                            | Estimate  | Std Error | t Ratio | Prob> t |
|---------------------------------|-----------|-----------|---------|---------|
| Intercept                       | -0.795594 | 0.208955  | -3.81   | 0.0003  |
| InMass                          | 0.6488825 | 0.050818  | 12.77   | <.0001  |
| In1st ionization potential (eV) | 0.1009187 | 0.032649  | 3.09    | 0.0026  |

<sup>208</sup>Pb

**Summary of Fit**

RSquare 0.632332  
 RSquare Adj 0.624426  
 Root Mean Square Error 0.589853  
 Mean of Response 1.717234  
 Observations (or Sum Wgts) 96

**Parameter Estimates**

| Term                            | Estimate  | Std Error | t Ratio | Prob> t |
|---------------------------------|-----------|-----------|---------|---------|
| Intercept                       | -1.332831 | 0.250193  | -5.33   | <.0001  |
| InMass                          | 0.7297448 | 0.057702  | 12.65   | <.0001  |
| In2nd ionization potential (eV) | 0.085388  | 0.03685   | 2.32    | 0.0227  |

<sup>209</sup>Bi

**Summary of Fit**

RSquare 0.780701  
 RSquare Adj 0.758015  
 Root Mean Square Error 0.442117  
 Mean of Response 1.703546  
 Observations (or Sum Wgts) 65

**Parameter Estimates**

| Term                            | Estimate  | Std Error | t Ratio | Prob> t |
|---------------------------------|-----------|-----------|---------|---------|
| Intercept                       | -1.136959 | 0.410893  | -2.77   | 0.0076  |
| InMass                          | 0.7273956 | 0.056431  | 12.89   | <.0001  |
| In2nd ionization potential (eV) | 0.1931852 | 0.045208  | 4.27    | <.0001  |
| InMelting Point (C)             | -0.147452 | 0.05784   | -2.55   | 0.0135  |
| InHeat Capacity (J/molK)        | 0.1354726 | 0.067163  | 2.02    | 0.0483  |
| InElectronegativity             | -0.347395 | 0.058917  | -5.90   | <.0001  |
| InCharge                        | 0.4425491 | 0.176523  | 2.51    | 0.0150  |

<sup>232</sup>Th

**Summary of Fit**

RSquare 0.69716  
 RSquare Adj 0.687495  
 Root Mean Square Error 0.534506  
 Mean of Response 1.663952  
 Observations (or Sum Wgts) 98

**Parameter Estimates**

| Term                | Estimate  | Std Error | t Ratio | Prob> t |
|---------------------|-----------|-----------|---------|---------|
| Intercept           | -1.563964 | 0.228441  | -6.85   | <.0001  |
| lnMass              | 0.659685  | 0.049769  | 13.25   | <.0001  |
| lnS (J/Kmol)        | 0.1343575 | 0.050317  | 2.67    | 0.0089  |
| lnElectronegativity | -0.194788 | 0.060877  | -3.20   | 0.0019  |

<sup>238</sup>U

**Summary of Fit**

RSquare 0.8035  
 RSquare Adj 0.794568  
 Root Mean Square Error 0.41341  
 Mean of Response 1.804777  
 Observations (or Sum Wgts) 93

**Parameter Estimates**

| Term                 | Estimate  | Std Error | t Ratio | Prob> t |
|----------------------|-----------|-----------|---------|---------|
| Intercept            | -2.436157 | 0.441842  | -5.51   | <.0001  |
| lnMass               | 1.3269737 | 0.071431  | 18.58   | <.0001  |
| lnBoiling Point (C)  | -0.445288 | 0.086596  | -5.14   | <.0001  |
| lnG of form (kJ/mol) | 0.3274847 | 0.067143  | 4.88    | <.0001  |
| lnElectronegativity  | 0.1279921 | 0.047751  | 2.68    | 0.0088  |

**Acetic**

<sup>7</sup>Li

**Summary of Fit**

RSquare 0.38494  
 RSquare Adj 0.363731  
 Root Mean Square Error 0.360641  
 Mean of Response 3.265835  
 Observations (or Sum Wgts) 91

**Parameter Estimates**

| Term                            | Estimate  | Std Error | t Ratio | Prob> t | VIF       |
|---------------------------------|-----------|-----------|---------|---------|-----------|
| Intercept                       | -1.714891 | 2.04073   | -0.84   | 0.4030  | .         |
| ln2nd ionization potential (eV) | 1.6824052 | 0.518824  | 3.24    | 0.0017  | 1.2217187 |
| lnS (J/Kmol)                    | -0.461718 | 0.086366  | -5.35   | <.0001  | 1.1126113 |
| lnElectronegativity             | 0.2348912 | 0.047624  | 4.93    | <.0001  | 1.1171232 |

<sup>9</sup>Be

**Summary of Fit**

RSquare 0.115271  
 RSquare Adj 0.106055  
 Root Mean Square Error 0.490516  
 Mean of Response 3.318261  
 Observations (or Sum Wgts) 98

**Parameter Estimates**

| Term                            | Estimate  | Std Error | t Ratio | Prob> t |
|---------------------------------|-----------|-----------|---------|---------|
| Intercept                       | 3.1821925 | 0.062733  | 50.73   | <.0001  |
| ln2nd ionization potential (eV) | 0.1393779 | 0.03941   | 3.54    | 0.0006  |

<sup>11</sup>B

**Summary of Fit**

|                            |          |
|----------------------------|----------|
| RSquare                    | 0.411439 |
| RSquare Adj                | 0.37522  |
| Root Mean Square Error     | 0.463578 |
| Mean of Response           | 2.972498 |
| Observations (or Sum Wgts) | 70       |

**Parameter Estimates**

| Term                            | Estimate  | Std Error | t Ratio | Prob> t |
|---------------------------------|-----------|-----------|---------|---------|
| Intercept                       | 0.9982841 | 0.799833  | 1.25    | 0.2165  |
| ln2nd ionization potential (eV) | 0.4599337 | 0.101961  | 4.51    | <.0001  |
| lnMelting Point (C)             | 0.2503682 | 0.079018  | 3.17    | 0.0023  |
| lnS (J/Kmol)                    | -0.267718 | 0.114972  | -2.33   | 0.0230  |
| lnCharge                        | 0.2367336 | 0.118724  | 1.99    | 0.0504  |

<sup>26</sup>Mg

**Summary of Fit**

|                            |          |
|----------------------------|----------|
| RSquare                    | 0.168595 |
| RSquare Adj                | 0.159934 |
| Root Mean Square Error     | 0.199395 |
| Mean of Response           | 5.143259 |
| Observations (or Sum Wgts) | 98       |

**Parameter Estimates**

| Term      | Estimate  | Std Error | t Ratio | Prob> t |
|-----------|-----------|-----------|---------|---------|
| Intercept | 4.7554077 | 0.090183  | 52.73   | <.0001  |
| lnMass    | 0.0897769 | 0.020348  | 4.41    | <.0001  |

<sup>27</sup>Al

**Summary of Fit**

|                            |          |
|----------------------------|----------|
| RSquare                    | 0.520859 |
| RSquare Adj                | 0.483426 |
| Root Mean Square Error     | 0.2229   |
| Mean of Response           | 3.892322 |
| Observations (or Sum Wgts) | 70       |

**Parameter Estimates**

| Term                            | Estimate  | Std Error | t Ratio | Prob> t |
|---------------------------------|-----------|-----------|---------|---------|
| Intercept                       | 3.9853835 | 0.194972  | 20.44   | <.0001  |
| ln1st ionization potential (eV) | -0.123054 | 0.043441  | -2.83   | 0.0062  |
| lnBoiling Point (C)             | -0.309467 | 0.061554  | -5.03   | <.0001  |
| lnHeat Capacity (J/molK)        | 0.0729706 | 0.026411  | 2.76    | 0.0075  |
| lnH of form (kJ/mol)            | 0.4068698 | 0.061897  | 6.57    | <.0001  |
| lnCharge                        | 0.1720326 | 0.062578  | 2.75    | 0.0078  |

<sup>44</sup>Ca

**Summary of Fit**

|                            |          |
|----------------------------|----------|
| RSquare                    | 0.265987 |
| RSquare Adj                | 0.258341 |
| Root Mean Square Error     | 0.196387 |
| Mean of Response           | 4.906971 |
| Observations (or Sum Wgts) | 98       |

**Parameter Estimates**

| Term      | Estimate  | Std Error | t Ratio | Prob> t |
|-----------|-----------|-----------|---------|---------|
| Intercept | 4.4078841 | 0.086912  | 50.72   | <.0001  |
| lnMass    | 0.1211772 | 0.020545  | 5.90    | <.0001  |

<sup>45</sup>Sc

**Summary of Fit**

Supplementary Material (ESI) for Journal of Analytical Atomic Spectrometry  
 This journal is © The Royal Society of Chemistry 2008

RSquare 0.08108  
 RSquare Adj 0.071407  
 Root Mean Square Error 0.348964  
 Mean of Response 3.746238  
 Observations (or Sum Wgts) 97

**Parameter Estimates**

| Term                     | Estimate  | Std Error | t Ratio | Prob> t |
|--------------------------|-----------|-----------|---------|---------|
| Intercept                | 3.7538988 | 0.035531  | 105.65  | <.0001  |
| lnHeat Capacity (J/molK) | 0.0969312 | 0.03348   | 2.90    | 0.0047  |

<sup>48</sup>Ti

**Summary of Fit**

RSquare 0.201457  
 RSquare Adj 0.149938  
 Root Mean Square Error 0.447786  
 Mean of Response 3.134685  
 Observations (or Sum Wgts) 67

**Parameter Estimates**

| Term                            | Estimate  | Std Error | t Ratio | Prob> t |
|---------------------------------|-----------|-----------|---------|---------|
| Intercept                       | -5.390994 | 2.367937  | -2.28   | 0.0263  |
| lnMass                          | -0.202629 | 0.077741  | -2.61   | 0.0114  |
| ln2nd ionization potential (eV) | 0.2578823 | 0.075013  | 3.44    | 0.0011  |
| ln ion mobility (C/Pa*s*A)      | -0.274113 | 0.075444  | -3.63   | 0.0006  |
| lnCharge                        | 0.7793257 | 0.279567  | 2.79    | 0.0070  |

<sup>51</sup>V

**Summary of Fit**

RSquare 0.381445  
 RSquare Adj 0.333336  
 Root Mean Square Error 0.640693  
 Mean of Response 2.516733  
 Observations (or Sum Wgts) 98

**Parameter Estimates**

| Term                            | Estimate  | Std Error | t Ratio | Prob> t |
|---------------------------------|-----------|-----------|---------|---------|
| Intercept                       | 1.3078325 | 0.700137  | 1.87    | 0.0650  |
| lnMass                          | -0.203395 | 0.068332  | -2.98   | 0.0037  |
| ln1st ionization potential (eV) | 0.2325066 | 0.104886  | 2.22    | 0.0292  |
| ln2nd ionization potential (eV) | -0.116601 | 0.059934  | -1.95   | 0.0548  |
| lnMelting Point (C)             | -0.214845 | 0.104623  | -2.05   | 0.0429  |
| lnHeat Capacity (J/molK)        | -0.178809 | 0.054619  | -3.27   | 0.0015  |
| lnH of form (kJ/mol)            | 0.6291778 | 0.153798  | 4.09    | <.0001  |
| lnS (J/Kmol)                    | 0.1207682 | 0.056773  | 2.13    | 0.0361  |

<sup>52</sup>Cr

**Summary of Fit**

RSquare 9.14e-14  
 RSquare Adj 9.14e-14  
 Root Mean Square Error 0.226542  
 Mean of Response 5.149789  
 Observations (or Sum Wgts) 98

**Parameter Estimates**

| Term      | Estimate  | Std Error | t Ratio | Prob> t |
|-----------|-----------|-----------|---------|---------|
| Intercept | 5.1497885 | 0.022884  | 225.04  | <.0001  |

<sup>55</sup>Mn

**Summary of Fit**

RSquare 0  
 RSquare Adj 0



Supplementary Material (ESI) for Journal of Analytical Atomic Spectrometry  
 This journal is © The Royal Society of Chemistry 2008

Root Mean Square Error 0.624581  
 Mean of Response 2.960036  
 Observations (or Sum Wgts) 98

**Parameter Estimates**

| Term      | Estimate  | Std Error | t Ratio | Prob> t |
|-----------|-----------|-----------|---------|---------|
| Intercept | 2.9600361 | 0.063092  | 46.92   | <.0001  |

<sup>57</sup>Fe

**Summary of Fit**

RSquare 0.465925  
 RSquare Adj 0.413393  
 Root Mean Square Error 0.521003  
 Mean of Response 2.889798  
 Observations (or Sum Wgts) 68

**Parameter Estimates**

| Term                      | Estimate  | Std Error | t Ratio | Prob> t |
|---------------------------|-----------|-----------|---------|---------|
| Intercept                 | -9.730123 | 4.989787  | -1.95   | 0.0558  |
| InMelting Point (C)       | 0.3591985 | 0.0819    | 4.39    | <.0001  |
| InBoiling Point (C)       | -0.228081 | 0.079556  | -2.87   | 0.0057  |
| InHeat Capacity (J/molK)  | -0.380586 | 0.071292  | -5.34   | <.0001  |
| InS (J/Kmol)              | 0.206106  | 0.055628  | 3.71    | 0.0005  |
| Inion mobility (C/Pa*s*A) | -0.356899 | 0.154704  | -2.31   | 0.0245  |
| InCharge                  | 0.5539864 | 0.208774  | 2.65    | 0.0101  |

<sup>58</sup>Ni

**Summary of Fit**

RSquare 0.308841  
 RSquare Adj 0.26425  
 Root Mean Square Error 0.54963  
 Mean of Response 2.749584  
 Observations (or Sum Wgts) 67

**Parameter Estimates**

| Term                     | Estimate  | Std Error | t Ratio | Prob> t |
|--------------------------|-----------|-----------|---------|---------|
| Intercept                | 1.8814686 | 0.446629  | 4.21    | <.0001  |
| InMelting Point (C)      | 0.3874868 | 0.108852  | 3.56    | 0.0007  |
| InBoiling Point (C)      | -0.271794 | 0.086514  | -3.14   | 0.0026  |
| InHeat Capacity (J/molK) | 0.1914757 | 0.065097  | 2.94    | 0.0046  |
| InCharge                 | 0.7224582 | 0.215826  | 3.35    | 0.0014  |

<sup>59</sup>Co

**Summary of Fit**

RSquare 0.512961  
 RSquare Adj 0.473039  
 Root Mean Square Error 0.650337  
 Mean of Response 2.358577  
 Observations (or Sum Wgts) 67

**Parameter Estimates**

| Term                     | Estimate  | Std Error | t Ratio | Prob> t |
|--------------------------|-----------|-----------|---------|---------|
| Intercept                | 2.4772008 | 0.529751  | 4.68    | <.0001  |
| InMass                   | -0.282289 | 0.097637  | -2.89   | 0.0053  |
| InMelting Point (C)      | 0.3973185 | 0.110229  | 3.60    | 0.0006  |
| InBoiling Point (C)      | -0.263438 | 0.107151  | -2.46   | 0.0168  |
| InHeat Capacity (J/molK) | -0.196368 | 0.079673  | -2.46   | 0.0165  |
| InCharge                 | 0.9595505 | 0.272952  | 3.52    | 0.0008  |

<sup>63</sup>Cu

**Summary of Fit**

RSquare 0.247382

Supplementary Material (ESI) for Journal of Analytical Atomic Spectrometry  
 This journal is © The Royal Society of Chemistry 2008

RSquare Adj 0.197208  
 Root Mean Square Error 0.539795  
 Mean of Response 2.859475  
 Observations (or Sum Wgts) 97

**Parameter Estimates**

| Term                            | Estimate  | Std Error | t Ratio | Prob> t |
|---------------------------------|-----------|-----------|---------|---------|
| Intercept                       | -0.468072 | 1.614463  | -0.29   | 0.7725  |
| lnMass                          | 0.1051041 | 0.059909  | 1.75    | 0.0828  |
| ln1st ionization potential (eV) | 0.168238  | 0.069554  | 2.42    | 0.0176  |
| ln2nd ionization potential (eV) | 0.1230709 | 0.050896  | 2.42    | 0.0176  |
| lnBoiling Point (C)             | -0.219398 | 0.06499   | -3.38   | 0.0011  |
| lnHeat Capacity (J/molK)        | -0.30779  | 0.073494  | -4.19   | <.0001  |
| Inion mobility (C/Pa*s*A)       | -0.134391 | 0.049813  | -2.70   | 0.0083  |

<sup>64</sup>Zn

**Summary of Fit**

RSquare 0.142152  
 RSquare Adj 0.1239  
 Root Mean Square Error 0.488005  
 Mean of Response 3.273576  
 Observations (or Sum Wgts) 97

**Parameter Estimates**

| Term                            | Estimate  | Std Error | t Ratio | Prob> t |
|---------------------------------|-----------|-----------|---------|---------|
| Intercept                       | 3.1210172 | 0.069657  | 44.81   | <.0001  |
| ln2nd ionization potential (eV) | 0.1575375 | 0.045839  | 3.44    | 0.0009  |
| lnHeat Capacity (J/molK)        | 0.0627846 | 0.037071  | 1.69    | 0.0936  |

<sup>69</sup>Ga

**Summary of Fit**

RSquare 0.188507  
 RSquare Adj 0.153225  
 Root Mean Square Error 0.595034  
 Mean of Response 2.913313  
 Observations (or Sum Wgts) 97

**Parameter Estimates**

| Term                            | Estimate  | Std Error | t Ratio | Prob> t |
|---------------------------------|-----------|-----------|---------|---------|
| Intercept                       | 2.5191849 | 0.39111   | 6.44    | <.0001  |
| ln1st ionization potential (eV) | -0.102696 | 0.057619  | -1.78   | 0.0780  |
| ln2nd ionization potential (eV) | 0.1581421 | 0.058205  | 2.72    | 0.0079  |
| lnMelting Point (C)             | -0.093561 | 0.051446  | -1.82   | 0.0722  |
| lnG of form (kJ/mol)            | 0.1676316 | 0.062166  | 2.70    | 0.0083  |

<sup>75</sup>As

**Summary of Fit**

RSquare 0.296376  
 RSquare Adj 0.27786  
 Root Mean Square Error 0.270397  
 Mean of Response 4.019103  
 Observations (or Sum Wgts) 79

**Parameter Estimates**

| Term                            | Estimate  | Std Error | t Ratio | Prob> t |
|---------------------------------|-----------|-----------|---------|---------|
| Intercept                       | 0.8659916 | 1.746445  | 0.50    | 0.6214  |
| ln2nd ionization potential (eV) | 0.1230542 | 0.023592  | 5.22    | <.0001  |
| Inion mobility (C/Pa*s*A)       | -0.097153 | 0.05601   | -1.73   | 0.0869  |

<sup>76</sup>Se

**Summary of Fit**

RSquare 0.169983  
 RSquare Adj 0.136782  
 Root Mean Square Error 0.313734

Supplementary Material (ESI) for Journal of Analytical Atomic Spectrometry  
This journal is © The Royal Society of Chemistry 2008

|                            |           |           |         |         |
|----------------------------|-----------|-----------|---------|---------|
| Mean of Response           | 4.5475    |           |         |         |
| Observations (or Sum Wgts) | 79        |           |         |         |
| <b>Parameter Estimates</b> |           |           |         |         |
| Term                       | Estimate  | Std Error | t Ratio | Prob> t |
| Intercept                  | -10.74496 | 3.983631  | -2.70   | 0.0086  |
| lnBoiling Point (C)        | 0.0855974 | 0.036441  | 2.35    | 0.0215  |
| lnion mobility (C/Pa*s*A)  | -0.458631 | 0.120695  | -3.80   | 0.0003  |
| lnCharge                   | 0.4183877 | 0.168952  | 2.48    | 0.0155  |

<sup>85</sup>Rb

**Summary of Fit**

|                            |          |
|----------------------------|----------|
| RSquare                    | 0.474051 |
| RSquare Adj                | 0.445467 |
| Root Mean Square Error     | 0.600223 |
| Mean of Response           | 2.570412 |
| Observations (or Sum Wgts) | 98       |

**Parameter Estimates**

|                                 |           |           |         |         |
|---------------------------------|-----------|-----------|---------|---------|
| Term                            | Estimate  | Std Error | t Ratio | Prob> t |
| Intercept                       | 1.0990971 | 0.562821  | 1.95    | 0.0539  |
| lnMass                          | 0.192653  | 0.072774  | 2.65    | 0.0095  |
| ln2nd ionization potential (eV) | 0.5157469 | 0.165441  | 3.12    | 0.0024  |
| lnBoiling Point (C)             | -0.27704  | 0.057016  | -4.86   | <.0001  |
| lnHeat Capacity (J/molK)        | 1.0807852 | 0.1818    | 5.94    | <.0001  |
| lnElectronegativity             | 0.2194735 | 0.111068  | 1.98    | 0.0511  |

<sup>88</sup>Sr

**Summary of Fit**

|                            |          |
|----------------------------|----------|
| RSquare                    | 0.491374 |
| RSquare Adj                | 0.467154 |
| Root Mean Square Error     | 0.602117 |
| Mean of Response           | 2.57203  |
| Observations (or Sum Wgts) | 67       |

**Parameter Estimates**

|                          |           |           |         |         |
|--------------------------|-----------|-----------|---------|---------|
| Term                     | Estimate  | Std Error | t Ratio | Prob> t |
| Intercept                | 2.8914495 | 0.176951  | 16.34   | <.0001  |
| lnHeat Capacity (J/molK) | 0.1550389 | 0.080202  | 1.93    | 0.0577  |
| lnElectronegativity      | 0.437058  | 0.083481  | 5.24    | <.0001  |
| lnCharge                 | 0.6099014 | 0.239372  | 2.55    | 0.0133  |

<sup>89</sup>Y

**Summary of Fit**

|                            |          |
|----------------------------|----------|
| RSquare                    | 0.477575 |
| RSquare Adj                | 0.397883 |
| Root Mean Square Error     | 0.616082 |
| Mean of Response           | 2.635473 |
| Observations (or Sum Wgts) | 69       |

**Parameter Estimates**

|                                 |           |           |         |         |
|---------------------------------|-----------|-----------|---------|---------|
| Term                            | Estimate  | Std Error | t Ratio | Prob> t |
| Intercept                       | -16.44362 | 4.622956  | -3.56   | 0.0007  |
| lnMass                          | 0.1791919 | 0.073763  | 2.43    | 0.0182  |
| ln1st ionization potential (eV) | -0.356826 | 0.191104  | -1.87   | 0.0668  |
| ln2nd ionization potential (eV) | -0.511102 | 0.153703  | -3.33   | 0.0015  |
| lnBoiling Point (C)             | 0.6315766 | 0.158134  | 3.99    | 0.0002  |
| lnH of form (kJ/mol)            | -0.273602 | 0.139625  | -1.96   | 0.0548  |
| lnS (J/Kmol)                    | 0.3359514 | 0.077985  | 4.31    | <.0001  |
| lnElectronegativity             | 0.5275843 | 0.165602  | 3.19    | 0.0023  |
| lnion mobility (C/Pa*s*A)       | -0.496393 | 0.12989   | -3.82   | 0.0003  |
| lnCharge                        | 1.2782341 | 0.260732  | 4.90    | <.0001  |

<sup>90</sup>Zr

**Summary of Fit**

|                            |          |
|----------------------------|----------|
| RSquare                    | 0.289045 |
| RSquare Adj                | 0.235723 |
| Root Mean Square Error     | 0.650518 |
| Mean of Response           | 2.550798 |
| Observations (or Sum Wgts) | 87       |

**Parameter Estimates**

| Term                      | Estimate  | Std Error | t Ratio | Prob> t |
|---------------------------|-----------|-----------|---------|---------|
| Intercept                 | -9.816194 | 3.470405  | -2.83   | 0.0059  |
| InMass                    | 0.2204691 | 0.078713  | 2.80    | 0.0064  |
| InBoiling Point (C)       | 0.1582666 | 0.074701  | 2.12    | 0.0372  |
| InHeat Capacity (J/molK)  | -0.12589  | 0.054405  | -2.31   | 0.0232  |
| InS (J/Kmol)              | 0.1591649 | 0.068149  | 2.34    | 0.0220  |
| Inion mobility (C/Pa*s*A) | -0.315135 | 0.106381  | -2.96   | 0.0040  |
| InCharge                  | 0.3113026 | 0.185877  | 1.67    | 0.0979  |

<sup>102</sup>Ru

**Summary of Fit**

|                            |          |
|----------------------------|----------|
| RSquare                    | 0.511858 |
| RSquare Adj                | 0.483478 |
| Root Mean Square Error     | 0.626903 |
| Mean of Response           | 2.407097 |
| Observations (or Sum Wgts) | 92       |

**Parameter Estimates**

| Term                      | Estimate  | Std Error | t Ratio | Prob> t |
|---------------------------|-----------|-----------|---------|---------|
| Intercept                 | 6.3630871 | 1.7739    | 3.59    | 0.0006  |
| InMass                    | 0.2387496 | 0.075466  | 3.16    | 0.0022  |
| InBoiling Point (C)       | 0.3448048 | 0.087266  | 3.95    | 0.0002  |
| InHeat Capacity (J/molK)  | -0.540595 | 0.079669  | -6.79   | <.0001  |
| InElectronegativity       | 0.4177574 | 0.066634  | 6.27    | <.0001  |
| Inion mobility (C/Pa*s*A) | 0.193691  | 0.056766  | 3.41    | 0.0010  |

<sup>103</sup>Rh

**Summary of Fit**

|                            |          |
|----------------------------|----------|
| RSquare                    | 0.734461 |
| RSquare Adj                | 0.699056 |
| Root Mean Square Error     | 0.532736 |
| Mean of Response           | 2.419281 |
| Observations (or Sum Wgts) | 69       |

**Parameter Estimates**

| Term                      | Estimate  | Std Error | t Ratio | Prob> t |
|---------------------------|-----------|-----------|---------|---------|
| Intercept                 | -8.684407 | 4.257364  | -2.04   | 0.0458  |
| InMass                    | 0.2055675 | 0.057356  | 3.58    | 0.0007  |
| InMelting Point (C)       | 0.4314474 | 0.150979  | 2.86    | 0.0059  |
| InBoiling Point (C)       | -0.280048 | 0.161217  | -1.74   | 0.0875  |
| InHeat Capacity (J/molK)  | -0.275867 | 0.067177  | -4.11   | 0.0001  |
| InS (J/Kmol)              | 0.3541299 | 0.079367  | 4.46    | <.0001  |
| InElectronegativity       | 0.3239779 | 0.05453   | 5.94    | <.0001  |
| Inion mobility (C/Pa*s*A) | -0.292605 | 0.127475  | -2.30   | 0.0252  |
| InCharge                  | 0.4644013 | 0.188719  | 2.46    | 0.0168  |

<sup>106</sup>Pd

**Summary of Fit**

|                            |          |
|----------------------------|----------|
| RSquare                    | 0.288932 |
| RSquare Adj                | 0.249428 |
| Root Mean Square Error     | 0.657446 |
| Mean of Response           | 2.583221 |
| Observations (or Sum Wgts) | 96       |

Supplementary Material (ESI) for Journal of Analytical Atomic Spectrometry  
This journal is © The Royal Society of Chemistry 2008

**Parameter Estimates**

| Term                            | Estimate  | Std Error | t Ratio | Prob> t |
|---------------------------------|-----------|-----------|---------|---------|
| Intercept                       | 2.0763942 | 0.517472  | 4.01    | 0.0001  |
| lnMass                          | 0.209201  | 0.070543  | 2.97    | 0.0039  |
| ln2nd ionization potential (eV) | 0.1407217 | 0.073776  | 1.91    | 0.0597  |
| lnMelting Point (C)             | 0.2442677 | 0.077839  | 3.14    | 0.0023  |
| lnG of form (kJ/mol)            | -0.322657 | 0.101698  | -3.17   | 0.0021  |
| lnElectronegativity             | 0.2414278 | 0.101909  | 2.37    | 0.0200  |

*<sup>109</sup>Ag*

**Summary of Fit**

|                            |          |
|----------------------------|----------|
| RSquare                    | 0.149612 |
| RSquare Adj                | 0.110514 |
| Root Mean Square Error     | 0.684656 |
| Mean of Response           | 2.698766 |
| Observations (or Sum Wgts) | 92       |

**Parameter Estimates**

| Term                            | Estimate  | Std Error | t Ratio | Prob> t |
|---------------------------------|-----------|-----------|---------|---------|
| Intercept                       | 2.6223736 | 0.453539  | 5.78    | <.0001  |
| lnMass                          | 0.1796319 | 0.07738   | 2.32    | 0.0226  |
| ln2nd ionization potential (eV) | 0.2042628 | 0.099737  | 2.05    | 0.0436  |
| lnG of form (kJ/mol)            | -0.159577 | 0.079903  | -2.00   | 0.0489  |
| lnCharge                        | -0.41859  | 0.180308  | -2.32   | 0.0226  |

*<sup>114</sup>Cd*

**Summary of Fit**

|                            |          |
|----------------------------|----------|
| RSquare                    | 0.249948 |
| RSquare Adj                | 0.217337 |
| Root Mean Square Error     | 0.588812 |
| Mean of Response           | 2.696636 |
| Observations (or Sum Wgts) | 97       |

**Parameter Estimates**

| Term                      | Estimate  | Std Error | t Ratio | Prob> t |
|---------------------------|-----------|-----------|---------|---------|
| Intercept                 | 8.5069888 | 2.529156  | 3.36    | 0.0011  |
| lnMass                    | 0.269138  | 0.067737  | 3.97    | 0.0001  |
| lnBoiling Point (C)       | -0.206521 | 0.074261  | -2.78   | 0.0066  |
| lnElectronegativity       | 0.1001932 | 0.056335  | 1.78    | 0.0786  |
| lnion mobility (C/Pa*s*A) | 0.1587572 | 0.071506  | 2.22    | 0.0289  |

*<sup>115</sup>In*

**Summary of Fit**

|                            |          |
|----------------------------|----------|
| RSquare                    | 0.280525 |
| RSquare Adj                | 0.24958  |
| Root Mean Square Error     | 0.873983 |
| Mean of Response           | 2.296821 |
| Observations (or Sum Wgts) | 98       |

**Parameter Estimates**

| Term                            | Estimate  | Std Error | t Ratio | Prob> t |
|---------------------------------|-----------|-----------|---------|---------|
| Intercept                       | 11.843163 | 4.404253  | 2.69    | 0.0085  |
| ln1st ionization potential (eV) | 0.3563991 | 0.098828  | 3.61    | 0.0005  |
| lnHeat Capacity (J/molK)        | 0.1692166 | 0.098073  | 1.73    | 0.0878  |
| lnH of form (kJ/mol)            | -0.17559  | 0.10423   | -1.68   | 0.0954  |
| lnion mobility (C/Pa*s*A)       | 0.2747392 | 0.136305  | 2.02    | 0.0467  |

*<sup>120</sup>Sn*

**Summary of Fit**

|                        |          |
|------------------------|----------|
| RSquare                | 0.336878 |
| RSquare Adj            | 0.30453  |
| Root Mean Square Error | 0.285307 |

Supplementary Material (ESI) for Journal of Analytical Atomic Spectrometry  
 This journal is © The Royal Society of Chemistry 2008

Mean of Response 3.547785  
 Observations (or Sum Wgts) 87

**Parameter Estimates**

| Term                            | Estimate  | Std Error | t Ratio | Prob> t |
|---------------------------------|-----------|-----------|---------|---------|
| Intercept                       | -2.098404 | 1.169498  | -1.79   | 0.0765  |
| lnMass                          | 0.0750448 | 0.035868  | 2.09    | 0.0395  |
| ln2nd ionization potential (eV) | -0.073218 | 0.02956   | -2.48   | 0.0153  |
| lnion mobility (C/Pa*s*A)       | -0.168608 | 0.037064  | -4.55   | <.0001  |
| lnCharge                        | 0.2945812 | 0.067294  | 4.38    | <.0001  |

<sup>121</sup>Sb

**Summary of Fit**

RSquare 0.264599  
 RSquare Adj 0.224847  
 Root Mean Square Error 0.457509  
 Mean of Response 3.171204  
 Observations (or Sum Wgts) 79

**Parameter Estimates**

| Term                            | Estimate  | Std Error | t Ratio | Prob> t |
|---------------------------------|-----------|-----------|---------|---------|
| Intercept                       | 4.0270578 | 0.335792  | 11.99   | <.0001  |
| ln1st ionization potential (eV) | 0.3628372 | 0.103778  | 3.50    | 0.0008  |
| ln2nd ionization potential (eV) | -0.094654 | 0.051986  | -1.82   | 0.0727  |
| lnMelting Point (C)             | -0.195077 | 0.052345  | -3.73   | 0.0004  |
| lnCharge                        | 0.2525542 | 0.146467  | 1.72    | 0.0888  |

<sup>130</sup>Te

**Summary of Fit**

RSquare 0.371914  
 RSquare Adj 0.332658  
 Root Mean Square Error 0.221331  
 Mean of Response 4.002681  
 Observations (or Sum Wgts) 86

**Parameter Estimates**

| Term                            | Estimate  | Std Error | t Ratio | Prob> t |
|---------------------------------|-----------|-----------|---------|---------|
| Intercept                       | 8.2118589 | 1.695131  | 4.84    | <.0001  |
| ln2nd ionization potential (eV) | 0.0556076 | 0.017052  | 3.26    | 0.0016  |
| lnBoiling Point (C)             | 0.0420279 | 0.024983  | 1.68    | 0.0964  |
| lnElectronegativity             | 0.152521  | 0.058953  | 2.59    | 0.0115  |
| lnion mobility (C/Pa*s*A)       | 0.1363974 | 0.052696  | 2.59    | 0.0114  |
| lnCharge                        | -0.209346 | 0.077196  | -2.71   | 0.0082  |

<sup>133</sup>Cs

**Summary of Fit**

RSquare 0.354999  
 RSquare Adj 0.334413  
 Root Mean Square Error 0.690416  
 Mean of Response 2.414241  
 Observations (or Sum Wgts) 98

**Parameter Estimates**

| Term                            | Estimate  | Std Error | t Ratio | Prob> t |
|---------------------------------|-----------|-----------|---------|---------|
| Intercept                       | 1.5689926 | 0.528229  | 2.97    | 0.0038  |
| ln2nd ionization potential (eV) | 0.4647803 | 0.124503  | 3.73    | 0.0003  |
| lnBoiling Point (C)             | -0.358575 | 0.071151  | -5.04   | <.0001  |
| lnHeat Capacity (J/molK)        | 1.4198728 | 0.211858  | 6.70    | <.0001  |

<sup>138</sup>Ba

**Summary of Fit**

RSquare 0.390582

Supplementary Material (ESI) for Journal of Analytical Atomic Spectrometry  
 This journal is © The Royal Society of Chemistry 2008

RSquare Adj 0.363193  
 Root Mean Square Error 0.524004  
 Mean of Response 2.854714  
 Observations (or Sum Wgts) 94

**Parameter Estimates**

| Term                     | Estimate  | Std Error | t Ratio | Prob> t |
|--------------------------|-----------|-----------|---------|---------|
| Intercept                | 3.3147628 | 0.458596  | 7.23    | <.0001  |
| InMelting Point (C)      | -0.258445 | 0.069347  | -3.73   | 0.0003  |
| InBoiling Point (C)      | 0.2113444 | 0.066968  | 3.16    | 0.0022  |
| InHeat Capacity (J/molK) | 0.1580449 | 0.05087   | 3.11    | 0.0025  |
| InElectronegativity      | 0.3249733 | 0.07202   | 4.51    | <.0001  |

<sup>140</sup>Ce

**Summary of Fit**

RSquare 0.17239  
 RSquare Adj 0.134771  
 Root Mean Square Error 0.87616  
 Mean of Response 2.476142  
 Observations (or Sum Wgts) 70

**Parameter Estimates**

| Term                | Estimate  | Std Error | t Ratio | Prob> t |
|---------------------|-----------|-----------|---------|---------|
| Intercept           | 3.2645882 | 0.681977  | 4.79    | <.0001  |
| InMass              | 0.2509206 | 0.130448  | 1.92    | 0.0587  |
| InMelting Point (C) | -0.305776 | 0.100086  | -3.06   | 0.0032  |
| InCharge            | 0.5289768 | 0.217293  | 2.43    | 0.0176  |

<sup>152</sup>Sm

**Summary of Fit**

RSquare 0.452126  
 RSquare Adj 0.433658  
 Root Mean Square Error 0.707321  
 Mean of Response 2.484808  
 Observations (or Sum Wgts) 93

**Parameter Estimates**

| Term                            | Estimate  | Std Error | t Ratio | Prob> t |
|---------------------------------|-----------|-----------|---------|---------|
| Intercept                       | 0.8916544 | 0.265535  | 3.36    | 0.0012  |
| In1st ionization potential (eV) | 0.2593455 | 0.072066  | 3.60    | 0.0005  |
| InHeat Capacity (J/molK)        | 0.8707246 | 0.160412  | 5.43    | <.0001  |
| InS (J/Kmol)                    | 0.2281589 | 0.078855  | 2.89    | 0.0048  |

<sup>153</sup>Eu

**Summary of Fit**

RSquare 0.563899  
 RSquare Adj 0.539937  
 Root Mean Square Error 0.630686  
 Mean of Response 2.542373  
 Observations (or Sum Wgts) 97

**Parameter Estimates**

| Term                            | Estimate  | Std Error | t Ratio | Prob> t |
|---------------------------------|-----------|-----------|---------|---------|
| Intercept                       | 6.4760994 | 2.293061  | 2.82    | 0.0058  |
| In1st ionization potential (eV) | 0.3396811 | 0.062975  | 5.39    | <.0001  |
| InMelting Point (C)             | -0.152588 | 0.067863  | -2.25   | 0.0270  |
| InHeat Capacity (J/molK)        | 0.3750706 | 0.089137  | 4.21    | <.0001  |
| InS (J/Kmol)                    | 0.2328649 | 0.084494  | 2.76    | 0.0071  |
| Inion mobility (C/Pa*s*A)       | 0.115273  | 0.067041  | 1.72    | 0.0889  |

<sup>159</sup>Tb

**Summary of Fit**

Supplementary Material (ESI) for Journal of Analytical Atomic Spectrometry  
 This journal is © The Royal Society of Chemistry 2008

RSquare 0.360207  
 RSquare Adj 0.299274  
 Root Mean Square Error 0.719164  
 Mean of Response 2.566893  
 Observations (or Sum Wgts) 70

**Parameter Estimates**

| Term                            | Estimate  | Std Error | t Ratio | Prob> t |
|---------------------------------|-----------|-----------|---------|---------|
| Intercept                       | -1.34662  | 1.048     | -1.28   | 0.2035  |
| In2nd ionization potential (eV) | -0.262942 | 0.144867  | -1.82   | 0.0743  |
| InBoiling Point (C)             | 0.231252  | 0.115114  | 2.01    | 0.0488  |
| InHeat Capacity (J/molK)        | 0.6826328 | 0.179914  | 3.79    | 0.0003  |
| InS (J/Kmol)                    | 0.6599374 | 0.202019  | 3.27    | 0.0018  |
| InElectronegativity             | 0.2845882 | 0.142781  | 1.99    | 0.0506  |
| InCharge                        | 0.4568077 | 0.218458  | 2.09    | 0.0406  |

<sup>166</sup>Er

**Summary of Fit**

RSquare 0.319271  
 RSquare Adj 0.254439  
 Root Mean Square Error 0.820912  
 Mean of Response 2.490042  
 Observations (or Sum Wgts) 70

**Parameter Estimates**

| Term                            | Estimate  | Std Error | t Ratio | Prob> t |
|---------------------------------|-----------|-----------|---------|---------|
| Intercept                       | -9.831733 | 6.709817  | -1.47   | 0.1478  |
| In2nd ionization potential (eV) | -0.210346 | 0.107281  | -1.96   | 0.0543  |
| InMelting Point (C)             | 0.3532491 | 0.104522  | 3.38    | 0.0012  |
| InHeat Capacity (J/molK)        | 0.2239053 | 0.09496   | 2.36    | 0.0215  |
| IndH of form (kJ/mol)           | -0.360773 | 0.106036  | -3.40   | 0.0012  |
| Inion mobility (C/Pa*s*A)       | -0.367756 | 0.206424  | -1.78   | 0.0796  |
| InCharge                        | 0.8881476 | 0.350288  | 2.54    | 0.0137  |

<sup>178</sup>Hf

**Summary of Fit**

RSquare 0.367732  
 RSquare Adj 0.309497  
 Root Mean Square Error 0.605333  
 Mean of Response 2.460062  
 Observations (or Sum Wgts) 84

**Parameter Estimates**

| Term                            | Estimate  | Std Error | t Ratio | Prob> t |
|---------------------------------|-----------|-----------|---------|---------|
| Intercept                       | -7.310603 | 2.899015  | -2.52   | 0.0138  |
| InMass                          | -0.200112 | 0.086295  | -2.32   | 0.0231  |
| In1st ionization potential (eV) | -0.265275 | 0.085092  | -3.12   | 0.0026  |
| In2nd ionization potential (eV) | 0.1912007 | 0.062489  | 3.06    | 0.0031  |
| IndG of form (kJ/mol)           | 0.2582268 | 0.085624  | 3.02    | 0.0035  |
| InElectronegativity             | 0.5364382 | 0.137935  | 3.89    | 0.0002  |
| Inion mobility (C/Pa*s*A)       | -0.302616 | 0.090966  | -3.33   | 0.0014  |
| InCharge                        | 0.3066988 | 0.155677  | 1.97    | 0.0525  |

<sup>184</sup>W

**Summary of Fit**

RSquare 0.447916  
 RSquare Adj 0.425833  
 Root Mean Square Error 0.367795  
 Mean of Response 3.004446  
 Observations (or Sum Wgts) 79

**Parameter Estimates**

| Term      | Estimate  | Std Error | t Ratio | Prob> t |
|-----------|-----------|-----------|---------|---------|
| Intercept | -1.961357 | 0.817775  | -2.40   | 0.0190  |



Supplementary Material (ESI) for Journal of Analytical Atomic Spectrometry  
This journal is © The Royal Society of Chemistry 2008

| Term                 | Estimate  | Std Error | t Ratio | Prob> t |
|----------------------|-----------|-----------|---------|---------|
| InMass               | 0.362715  | 0.051184  | 7.09    | <.0001  |
| InH of form (kJ/mol) | 0.5021696 | 0.111732  | 4.49    | <.0001  |
| InCharge             | 0.4305058 | 0.130089  | 3.31    | 0.0014  |

<sup>192</sup>Os

**Summary of Fit**

|                            |          |
|----------------------------|----------|
| RSquare                    | 0.430695 |
| RSquare Adj                | 0.391701 |
| Root Mean Square Error     | 0.197637 |
| Mean of Response           | 3.76388  |
| Observations (or Sum Wgts) | 79       |

**Parameter Estimates**

| Term                      | Estimate  | Std Error | t Ratio | Prob> t |
|---------------------------|-----------|-----------|---------|---------|
| Intercept                 | 7.5568909 | 1.395385  | 5.42    | <.0001  |
| InMass                    | 0.060631  | 0.031183  | 1.94    | 0.0557  |
| InHeat Capacity (J/molK)  | -0.075624 | 0.025361  | -2.98   | 0.0039  |
| InH of form (kJ/mol)      | 0.1104029 | 0.065942  | 1.67    | 0.0984  |
| InS (J/Kmol)              | 0.0765118 | 0.033839  | 2.26    | 0.0267  |
| Inion mobility (C/Pa*s*A) | 0.1564023 | 0.04834   | 3.24    | 0.0018  |

<sup>193</sup>Ir

**Summary of Fit**

|                            |          |
|----------------------------|----------|
| RSquare                    | 0.58574  |
| RSquare Adj                | 0.550732 |
| Root Mean Square Error     | 0.376189 |
| Mean of Response           | 2.798629 |
| Observations (or Sum Wgts) | 78       |

**Parameter Estimates**

| Term                     | Estimate  | Std Error | t Ratio | Prob> t |
|--------------------------|-----------|-----------|---------|---------|
| Intercept                | -0.412502 | 0.527817  | -0.78   | 0.4371  |
| InMass                   | 0.2221666 | 0.05616   | 3.96    | 0.0002  |
| InMelting Point (C)      | -0.173574 | 0.081643  | -2.13   | 0.0370  |
| InBoiling Point (C)      | 0.3139923 | 0.055664  | 5.64    | <.0001  |
| InHeat Capacity (J/molK) | -0.116925 | 0.044505  | -2.63   | 0.0105  |
| InS (J/Kmol)             | 0.2634079 | 0.068155  | 3.86    | 0.0002  |
| InCharge                 | 0.6566977 | 0.145274  | 4.52    | <.0001  |

<sup>195</sup>Pt

**Summary of Fit**

|                            |          |
|----------------------------|----------|
| RSquare                    | 0.674876 |
| RSquare Adj                | 0.652607 |
| Root Mean Square Error     | 0.524127 |
| Mean of Response           | 2.346603 |
| Observations (or Sum Wgts) | 79       |

**Parameter Estimates**

| Term                      | Estimate  | Std Error | t Ratio | Prob> t |
|---------------------------|-----------|-----------|---------|---------|
| Intercept                 | 10.633562 | 3.686065  | 2.88    | 0.0051  |
| InMass                    | 0.4449925 | 0.074657  | 5.96    | <.0001  |
| InBoiling Point (C)       | 0.2396242 | 0.114688  | 2.09    | 0.0402  |
| InHeat Capacity (J/molK)  | -0.133706 | 0.055489  | -2.41   | 0.0185  |
| InS (J/Kmol)              | 0.406584  | 0.09087   | 4.47    | <.0001  |
| Inion mobility (C/Pa*s*A) | 0.4116399 | 0.125355  | 3.28    | 0.0016  |

<sup>197</sup>Au

**Summary of Fit**

|                        |          |
|------------------------|----------|
| RSquare                | 0.145995 |
| RSquare Adj            | 0.126804 |
| Root Mean Square Error | 0.385775 |

Supplementary Material (ESI) for Journal of Analytical Atomic Spectrometry  
 This journal is © The Royal Society of Chemistry 2008

|                            |           |           |         |         |
|----------------------------|-----------|-----------|---------|---------|
| Mean of Response           | 3.26896   |           |         |         |
| Observations (or Sum Wgts) | 92        |           |         |         |
| <b>Parameter Estimates</b> |           |           |         |         |
| Term                       | Estimate  | Std Error | t Ratio | Prob> t |
| Intercept                  | 3.3747036 | 0.096179  | 35.09   | <.0001  |
| lnS (J/Kmol)               | 0.0646393 | 0.030081  | 2.15    | 0.0344  |
| lnElectronegativity        | 0.1206971 | 0.037542  | 3.21    | 0.0018  |

<sup>202</sup>Hg

**Summary of Fit**

|                            |          |
|----------------------------|----------|
| RSquare                    | 0.176454 |
| RSquare Adj                | 0.139852 |
| Root Mean Square Error     | 0.732749 |
| Mean of Response           | 2.530592 |
| Observations (or Sum Wgts) | 95       |

**Parameter Estimates**

|                                 |           |           |         |         |
|---------------------------------|-----------|-----------|---------|---------|
| Term                            | Estimate  | Std Error | t Ratio | Prob> t |
| Intercept                       | 9.3577532 | 2.763823  | 3.39    | 0.0011  |
| ln1st ionization potential (eV) | -0.637357 | 0.177946  | -3.58   | 0.0006  |
| ln2nd ionization potential (eV) | 0.1905119 | 0.069585  | 2.74    | 0.0075  |
| lnMelting Point (C)             | -0.209056 | 0.089717  | -2.33   | 0.0220  |
| lnion mobility (C/Pa*s*A)       | 0.1527845 | 0.078981  | 1.93    | 0.0562  |

<sup>205</sup>Tl

**Summary of Fit**

|                            |          |
|----------------------------|----------|
| RSquare                    | 0.57405  |
| RSquare Adj                | 0.527583 |
| Root Mean Square Error     | 0.7137   |
| Mean of Response           | 2.348401 |
| Observations (or Sum Wgts) | 62       |

**Parameter Estimates**

|                                 |           |           |         |         |
|---------------------------------|-----------|-----------|---------|---------|
| Term                            | Estimate  | Std Error | t Ratio | Prob> t |
| Intercept                       | 15.639571 | 6.370104  | 2.46    | 0.0173  |
| lnMass                          | 0.2935948 | 0.121792  | 2.41    | 0.0193  |
| ln1st ionization potential (eV) | 0.1824588 | 0.051565  | 3.54    | 0.0008  |
| lnS (J/Kmol)                    | 0.1368823 | 0.080291  | 1.70    | 0.0939  |
| lnElectronegativity             | -0.210701 | 0.089088  | -2.37   | 0.0216  |
| lnion mobility (C/Pa*s*A)       | 0.4826426 | 0.193021  | 2.50    | 0.0154  |
| lnCharge                        | 0.9573073 | 0.370369  | 2.58    | 0.0124  |

<sup>208</sup>Pb

**Summary of Fit**

|                            |          |
|----------------------------|----------|
| RSquare                    | 0.336668 |
| RSquare Adj                | 0.293872 |
| Root Mean Square Error     | 0.71208  |
| Mean of Response           | 2.577177 |
| Observations (or Sum Wgts) | 67       |

**Parameter Estimates**

|                                 |           |           |         |         |
|---------------------------------|-----------|-----------|---------|---------|
| Term                            | Estimate  | Std Error | t Ratio | Prob> t |
| Intercept                       | 3.6139714 | 0.41603   | 8.69    | <.0001  |
| ln2nd ionization potential (eV) | -0.142533 | 0.049425  | -2.88   | 0.0054  |
| lnG of form (kJ/mol)            | -0.316419 | 0.081106  | -3.90   | 0.0002  |
| lnS (J/Kmol)                    | 0.2011339 | 0.078676  | 2.56    | 0.0130  |
| lnCharge                        | 0.6659431 | 0.197453  | 3.37    | 0.0013  |

<sup>209</sup>Bi

**Summary of Fit**

|         |         |
|---------|---------|
| RSquare | 0.33238 |
|---------|---------|

RSquare Adj 0.302374  
 Root Mean Square Error 0.454296  
 Mean of Response 2.983691  
 Observations (or Sum Wgts) 94

**Parameter Estimates**

| Term                  | Estimate  | Std Error | t Ratio | Prob> t |
|-----------------------|-----------|-----------|---------|---------|
| Intercept             | 2.5873187 | 0.271776  | 9.52    | <.0001  |
| InMass                | 0.183025  | 0.046557  | 3.93    | 0.0002  |
| IndG of form (kJ/mol) | -0.205134 | 0.041268  | -4.97   | <.0001  |
| InS (J/Kmol)          | 0.0967156 | 0.044044  | 2.20    | 0.0307  |
| InElectronegativity   | -0.262637 | 0.058787  | -4.47   | <.0001  |

<sup>232</sup>Th

**Summary of Fit**

RSquare 0.268306  
 RSquare Adj 0.235047  
 Root Mean Square Error 0.706107  
 Mean of Response 2.63236  
 Observations (or Sum Wgts) 70

**Parameter Estimates**

| Term         | Estimate  | Std Error | t Ratio | Prob> t |
|--------------|-----------|-----------|---------|---------|
| Intercept    | 1.0821626 | 0.334419  | 3.24    | 0.0019  |
| InMass       | 0.2703447 | 0.074177  | 3.64    | 0.0005  |
| InS (J/Kmol) | 0.1674039 | 0.071029  | 2.36    | 0.0214  |
| InCharge     | 0.2928901 | 0.173865  | 1.68    | 0.0968  |

<sup>238</sup>U

**Summary of Fit**

RSquare 0.589271  
 RSquare Adj 0.550418  
 Root Mean Square Error 0.673207  
 Mean of Response 2.458439  
 Observations (or Sum Wgts) 82

**Parameter Estimates**

| Term                            | Estimate  | Std Error | t Ratio | Prob> t |
|---------------------------------|-----------|-----------|---------|---------|
| Intercept                       | 3.7531719 | 1.250075  | 3.00    | 0.0037  |
| InMass                          | 0.4757017 | 0.139558  | 3.41    | 0.0011  |
| In2nd ionization potential (eV) | -0.210083 | 0.10543   | -1.99   | 0.0500  |
| InBoiling Point (C)             | -0.755315 | 0.166153  | -4.55   | <.0001  |
| IndG of form (kJ/mol)           | 0.3699116 | 0.158259  | 2.34    | 0.0221  |
| InS (J/Kmol)                    | 0.3967466 | 0.124373  | 3.19    | 0.0021  |
| InElectronegativity             | 0.5179023 | 0.121245  | 4.27    | <.0001  |
| InCharge                        | 0.4429326 | 0.176855  | 2.50    | 0.0145  |

Torch

<sup>7</sup>Li

**Summary of Fit**

RSquare 0.495338  
 RSquare Adj 0.478134  
 Root Mean Square Error 0.163071  
 Mean of Response 3.820941  
 Observations (or Sum Wgts) 92

**Parameter Estimates**

| Term                     | Estimate  | Std Error | t Ratio | Prob> t |
|--------------------------|-----------|-----------|---------|---------|
| Intercept                | 2.8684634 | 0.180236  | 15.92   | <.0001  |
| InMelting Point (C)      | -0.057042 | 0.015777  | -3.62   | 0.0005  |
| InHeat Capacity (J/molK) | -0.045864 | 0.016356  | -2.80   | 0.0062  |
| InS (J/Kmol)             | 0.3667962 | 0.044864  | 8.18    | <.0001  |

<sup>9</sup>Be

**Summary of Fit**

RSquare 0.329022  
 RSquare Adj 0.299849  
 Root Mean Square Error 0.189738  
 Mean of Response 3.549889  
 Observations (or Sum Wgts) 97

**Parameter Estimates**

| Term                            | Estimate  | Std Error | t Ratio | Prob> t | VIF       |
|---------------------------------|-----------|-----------|---------|---------|-----------|
| Intercept                       | 2.1288347 | 0.256266  | 8.31    | <.0001  | .         |
| ln2nd ionization potential (eV) | -0.03952  | 0.016617  | -2.38   | 0.0195  | 1.1717349 |
| lnMelting Point (C)             | 0.0769632 | 0.028092  | 2.74    | 0.0074  | 1.2366642 |
| lnS (J/Kmol)                    | 0.2865063 | 0.046526  | 6.16    | <.0001  | 1.0705843 |
| lnElectronegativity             | 0.0426068 | 0.020998  | 2.03    | 0.0453  | 1.4055399 |

<sup>11</sup>B

**Summary of Fit**

RSquare 0.503409  
 RSquare Adj 0.475193  
 Root Mean Square Error 0.111055  
 Mean of Response 4.326334  
 Observations (or Sum Wgts) 94

**Parameter Estimates**

| Term                            | Estimate  | Std Error | t Ratio | Prob> t |
|---------------------------------|-----------|-----------|---------|---------|
| Intercept                       | 4.1836368 | 0.135674  | 30.84   | <.0001  |
| lnMass                          | 0.1516052 | 0.017786  | 8.52    | <.0001  |
| ln1st ionization potential (eV) | 0.0264724 | 0.013042  | 2.03    | 0.0454  |
| lnH of form (kJ/mol)            | -0.058861 | 0.017369  | -3.39   | 0.0011  |
| lnS (J/Kmol)                    | -0.088389 | 0.028945  | -3.05   | 0.0030  |
| lnElectronegativity             | -0.088902 | 0.026906  | -3.30   | 0.0014  |

<sup>26</sup>Mg

**Summary of Fit**

RSquare 0  
 RSquare Adj 0  
 Root Mean Square Error 0.493139  
 Mean of Response 2.271879  
 Observations (or Sum Wgts) 98

**Parameter Estimates**

| Term      | Estimate  | Std Error | t Ratio | Prob> t |
|-----------|-----------|-----------|---------|---------|
| Intercept | 2.2718788 | 0.049815  | 45.61   | <.0001  |

<sup>27</sup>Al

**Summary of Fit**

RSquare 3.08e-14  
 RSquare Adj 3.08e-14  
 Root Mean Square Error 0.276251  
 Mean of Response 2.995695  
 Observations (or Sum Wgts) 98

**Parameter Estimates**

| Term      | Estimate  | Std Error | t Ratio | Prob> t |
|-----------|-----------|-----------|---------|---------|
| Intercept | 2.9956953 | 0.027906  | 107.35  | <.0001  |

<sup>44</sup>Ca

**Summary of Fit**

RSquare 0.112341  
 RSquare Adj 0.093653

Supplementary Material (ESI) for Journal of Analytical Atomic Spectrometry  
 This journal is © The Royal Society of Chemistry 2008

|                            |           |           |         |         |
|----------------------------|-----------|-----------|---------|---------|
| Root Mean Square Error     |           | 0.225223  |         |         |
| Mean of Response           |           | 3.657432  |         |         |
| Observations (or Sum Wgts) |           | 98        |         |         |
| <b>Parameter Estimates</b> |           |           |         |         |
| Term                       | Estimate  | Std Error | t Ratio | Prob> t |
| Intercept                  | 3.7361161 | 0.140811  | 26.53   | <.0001  |
| InMass                     | 0.0773456 | 0.025742  | 3.00    | 0.0034  |
| InS (J/Kmol)               | -0.13     | 0.046524  | -2.79   | 0.0063  |

<sup>45</sup>Sc

**Summary of Fit**

|                            |           |           |         |         |
|----------------------------|-----------|-----------|---------|---------|
| RSquare                    |           | 0         |         |         |
| RSquare Adj                |           | 0         |         |         |
| Root Mean Square Error     |           | 0.663016  |         |         |
| Mean of Response           |           | 1.821576  |         |         |
| Observations (or Sum Wgts) |           | 98        |         |         |
| <b>Parameter Estimates</b> |           |           |         |         |
| Term                       | Estimate  | Std Error | t Ratio | Prob> t |
| Intercept                  | 1.8215761 | 0.066975  | 27.20   | <.0001  |

<sup>48</sup>Ti

**Summary of Fit**

|                            |           |           |         |         |
|----------------------------|-----------|-----------|---------|---------|
| RSquare                    |           | 1.11e-15  |         |         |
| RSquare Adj                |           | 1.33e-15  |         |         |
| Root Mean Square Error     |           | 0.710773  |         |         |
| Mean of Response           |           | 1.783117  |         |         |
| Observations (or Sum Wgts) |           | 98        |         |         |
| <b>Parameter Estimates</b> |           |           |         |         |
| Term                       | Estimate  | Std Error | t Ratio | Prob> t |
| Intercept                  | 1.7831172 | 0.071799  | 24.83   | <.0001  |

<sup>51</sup>V

**Summary of Fit**

|                                 |           |           |         |         |
|---------------------------------|-----------|-----------|---------|---------|
| RSquare                         |           | 0.070974  |         |         |
| RSquare Adj                     |           | 0.050329  |         |         |
| Root Mean Square Error          |           | 0.678958  |         |         |
| Mean of Response                |           | 1.794319  |         |         |
| Observations (or Sum Wgts)      |           | 93        |         |         |
| <b>Parameter Estimates</b>      |           |           |         |         |
| Term                            | Estimate  | Std Error | t Ratio | Prob> t |
| Intercept                       | 1.6519181 | 0.096925  | 17.04   | <.0001  |
| In1st ionization potential (eV) | 0.1880287 | 0.081591  | 2.30    | 0.0235  |
| InCharge                        | 0.4785259 | 0.20397   | 2.35    | 0.0212  |

<sup>52</sup>Cr

**Summary of Fit**

|                            |           |           |         |         |
|----------------------------|-----------|-----------|---------|---------|
| RSquare                    |           | 0.104478  |         |         |
| RSquare Adj                |           | 0.095051  |         |         |
| Root Mean Square Error     |           | 0.37303   |         |         |
| Mean of Response           |           | 2.526425  |         |         |
| Observations (or Sum Wgts) |           | 97        |         |         |
| <b>Parameter Estimates</b> |           |           |         |         |
| Term                       | Estimate  | Std Error | t Ratio | Prob> t |
| Intercept                  | 2.3307198 | 0.06993   | 33.33   | <.0001  |
| InS (J/Kmol)               | 0.1061682 | 0.03189   | 3.33    | 0.0012  |

<sup>55</sup>Mn

### Summary of Fit

RSquare 2.11e-15  
RSquare Adj 2.11e-15  
Root Mean Square Error 0.521441  
Mean of Response 2.106978  
Observations (or Sum Wgts) 98

### Parameter Estimates

| Term      | Estimate  | Std Error | t Ratio | Prob> t |
|-----------|-----------|-----------|---------|---------|
| Intercept | 2.1069783 | 0.052673  | 40.00   | <.0001  |

<sup>57</sup>Fe

### Summary of Fit

RSquare 3.94e-14  
RSquare Adj 3.94e-14  
Root Mean Square Error 0.244007  
Mean of Response 3.491835  
Observations (or Sum Wgts) 98

### Parameter Estimates

| Term      | Estimate  | Std Error | t Ratio | Prob> t |
|-----------|-----------|-----------|---------|---------|
| Intercept | 3.4918349 | 0.024648  | 141.67  | <.0001  |

<sup>58</sup>Ni

### Summary of Fit

RSquare 0  
RSquare Adj 0  
Root Mean Square Error 0.500063  
Mean of Response 2.183523  
Observations (or Sum Wgts) 98

### Parameter Estimates

| Term      | Estimate  | Std Error | t Ratio | Prob> t |
|-----------|-----------|-----------|---------|---------|
| Intercept | 2.1835227 | 0.050514  | 43.23   | <.0001  |

<sup>59</sup>Co

### Summary of Fit

RSquare 0  
RSquare Adj 0  
Root Mean Square Error 0.645321  
Mean of Response 2.112315  
Observations (or Sum Wgts) 98

### Parameter Estimates

| Term      | Estimate  | Std Error | t Ratio | Prob> t |
|-----------|-----------|-----------|---------|---------|
| Intercept | 2.1123153 | 0.065187  | 32.40   | <.0001  |

<sup>63</sup>Cu

### Summary of Fit

RSquare 0.215726  
RSquare Adj 0.199039  
Root Mean Square Error 0.591259  
Mean of Response 1.994278  
Observations (or Sum Wgts) 97

### Parameter Estimates

| Term                      | Estimate  | Std Error | t Ratio | Prob> t |
|---------------------------|-----------|-----------|---------|---------|
| Intercept                 | 8.1426704 | 1.596616  | 5.10    | <.0001  |
| lnS (J/Kmol)              | 0.2434057 | 0.064776  | 3.76    | 0.0003  |
| Inion mobility (C/Pa*s*A) | 0.2080176 | 0.05017   | 4.15    | <.0001  |

<sup>64</sup>Zn

### Summary of Fit

RSquare 1.55e-15  
 RSquare Adj 1.55e-15  
 Root Mean Square Error 0.624616  
 Mean of Response 2.184429  
 Observations (or Sum Wgts) 98

#### Parameter Estimates

| Term      | Estimate  | Std Error | t Ratio | Prob> t |
|-----------|-----------|-----------|---------|---------|
| Intercept | 2.1844287 | 0.063096  | 34.62   | <.0001  |

### <sup>69</sup>Ga

#### Summary of Fit

RSquare 0.145544  
 RSquare Adj 0.117981  
 Root Mean Square Error 0.735367  
 Mean of Response 1.733514  
 Observations (or Sum Wgts) 97

#### Parameter Estimates

| Term                  | Estimate  | Std Error | t Ratio | Prob> t |
|-----------------------|-----------|-----------|---------|---------|
| Intercept             | 0.5386438 | 0.646332  | 0.83    | 0.4068  |
| InBoiling Point (C)   | 0.3819408 | 0.163634  | 2.33    | 0.0217  |
| IndH of form (kJ/mol) | -0.388203 | 0.139351  | -2.79   | 0.0065  |
| InS (J/Kmol)          | 0.2131088 | 0.077714  | 2.74    | 0.0073  |

### <sup>75</sup>As

#### Summary of Fit

RSquare 0.348346  
 RSquare Adj 0.303712  
 Root Mean Square Error 0.388087  
 Mean of Response 2.285338  
 Observations (or Sum Wgts) 79

#### Parameter Estimates

| Term                     | Estimate  | Std Error | t Ratio | Prob> t |
|--------------------------|-----------|-----------|---------|---------|
| Intercept                | 1.5768863 | 0.248171  | 6.35    | <.0001  |
| InMass                   | 0.1674768 | 0.060404  | 2.77    | 0.0071  |
| InHeat Capacity (J/molK) | 0.088459  | 0.050348  | 1.76    | 0.0831  |
| InS (J/Kmol)             | 0.1843268 | 0.039745  | 4.64    | <.0001  |
| InElectronegativity      | -0.438179 | 0.119079  | -3.68   | 0.0004  |
| InCharge                 | -0.435677 | 0.129623  | -3.36   | 0.0012  |

### <sup>76</sup>Se

#### Summary of Fit

RSquare 0.123735  
 RSquare Adj 0.07637  
 Root Mean Square Error 0.180486  
 Mean of Response 3.826908  
 Observations (or Sum Wgts) 79

#### Parameter Estimates

| Term                | Estimate  | Std Error | t Ratio | Prob> t |
|---------------------|-----------|-----------|---------|---------|
| Intercept           | 3.6455898 | 0.113327  | 32.17   | <.0001  |
| InMass              | 0.0456459 | 0.026376  | 1.73    | 0.0877  |
| InS (J/Kmol)        | 0.0600858 | 0.024239  | 2.48    | 0.0155  |
| InElectronegativity | -0.139072 | 0.079793  | -1.74   | 0.0855  |
| InCharge            | -0.105001 | 0.058411  | -1.80   | 0.0763  |

### <sup>85</sup>Rb

#### Summary of Fit

RSquare 0.409867

Supplementary Material (ESI) for Journal of Analytical Atomic Spectrometry  
 This journal is © The Royal Society of Chemistry 2008

RSquare Adj 0.375951  
 Root Mean Square Error 0.605905  
 Mean of Response 1.765266  
 Observations (or Sum Wgts) 93

**Parameter Estimates**

| Term                     | Estimate  | Std Error | t Ratio | Prob> t |
|--------------------------|-----------|-----------|---------|---------|
| Intercept                | 0.0456    | 0.539734  | 0.08    | 0.9329  |
| InMass                   | 0.3545218 | 0.075183  | 4.72    | <.0001  |
| InMelting Point (C)      | 0.1301892 | 0.068018  | 1.91    | 0.0589  |
| InBoiling Point (C)      | -0.317524 | 0.072167  | -4.40   | <.0001  |
| InHeat Capacity (J/molK) | 1.0190602 | 0.157456  | 6.47    | <.0001  |
| InCharge                 | 0.6414139 | 0.166078  | 3.86    | 0.0002  |

<sup>88</sup>Sr

**Summary of Fit**

RSquare 0.189054  
 RSquare Adj 0.154175  
 Root Mean Square Error 0.699325  
 Mean of Response 1.78034  
 Observations (or Sum Wgts) 98

**Parameter Estimates**

| Term                            | Estimate  | Std Error | t Ratio | Prob> t |
|---------------------------------|-----------|-----------|---------|---------|
| Intercept                       | 7.628562  | 2.627292  | 2.90    | 0.0046  |
| InMass                          | 0.2002054 | 0.07561   | 2.65    | 0.0095  |
| In2nd ionization potential (eV) | 0.2015738 | 0.05232   | 3.85    | 0.0002  |
| InMelting Point (C)             | -0.127467 | 0.074329  | -1.71   | 0.0897  |
| Inion mobility (C/Pa*s*A)       | 0.1880869 | 0.078542  | 2.39    | 0.0186  |

<sup>89</sup>Y

**Summary of Fit**

RSquare 0.164833  
 RSquare Adj 0.136681  
 Root Mean Square Error 0.683887  
 Mean of Response 1.771743  
 Observations (or Sum Wgts) 93

**Parameter Estimates**

| Term                     | Estimate  | Std Error | t Ratio | Prob> t |
|--------------------------|-----------|-----------|---------|---------|
| Intercept                | 2.7872624 | 0.463029  | 6.02    | <.0001  |
| InMelting Point (C)      | -0.119813 | 0.067467  | -1.78   | 0.0792  |
| InHeat Capacity (J/molK) | 0.2865252 | 0.087129  | 3.29    | 0.0014  |
| InElectronegativity      | 0.2192943 | 0.080332  | 2.73    | 0.0076  |

<sup>90</sup>Zr

**Summary of Fit**

RSquare 0.358009  
 RSquare Adj 0.30986  
 Root Mean Square Error 0.467403  
 Mean of Response 1.964459  
 Observations (or Sum Wgts) 87

**Parameter Estimates**

| Term                            | Estimate  | Std Error | t Ratio | Prob> t |
|---------------------------------|-----------|-----------|---------|---------|
| Intercept                       | 0.9603034 | 0.473708  | 2.03    | 0.0460  |
| In2nd ionization potential (eV) | 0.3313088 | 0.073745  | 4.49    | <.0001  |
| InMelting Point (C)             | -0.158909 | 0.064421  | -2.47   | 0.0158  |
| InBoiling Point (C)             | 0.2219971 | 0.060666  | 3.66    | 0.0005  |
| InHeat Capacity (J/molK)        | -0.112651 | 0.038203  | -2.95   | 0.0042  |
| InS (J/Kmol)                    | 0.1123154 | 0.04862   | 2.31    | 0.0235  |
| InCharge                        | -0.40123  | 0.119048  | -3.37   | 0.0012  |



Supplementary Material (ESI) for Journal of Analytical Atomic Spectrometry  
This journal is © The Royal Society of Chemistry 2008

<sup>102</sup>Ru

**Summary of Fit**

RSquare 0.316568  
RSquare Adj 0.268325  
Root Mean Square Error 0.678438  
Mean of Response 1.612704  
Observations (or Sum Wgts) 92

**Parameter Estimates**

| Term                            | Estimate  | Std Error | t Ratio | Prob> t |
|---------------------------------|-----------|-----------|---------|---------|
| Intercept                       | 2.1994002 | 0.559512  | 3.93    | 0.0002  |
| lnMass                          | 0.3151726 | 0.082345  | 3.83    | 0.0002  |
| ln1st ionization potential (eV) | 0.189024  | 0.064442  | 2.93    | 0.0043  |
| ln2nd ionization potential (eV) | -0.353447 | 0.069966  | -5.05   | <.0001  |
| lnG of form (kJ/mol)            | -0.292886 | 0.093866  | -3.12   | 0.0025  |
| lnS (J/Kmol)                    | 0.2340986 | 0.085677  | 2.73    | 0.0076  |
| lnElectronegativity             | 0.1600788 | 0.071912  | 2.23    | 0.0287  |

<sup>103</sup>Rh

**Summary of Fit**

RSquare 0.341586  
RSquare Adj 0.290148  
Root Mean Square Error 0.623378  
Mean of Response 1.678852  
Observations (or Sum Wgts) 70

**Parameter Estimates**

| Term                            | Estimate  | Std Error | t Ratio | Prob> t |
|---------------------------------|-----------|-----------|---------|---------|
| Intercept                       | -0.633866 | 0.723567  | -0.88   | 0.3843  |
| lnMass                          | 0.2284734 | 0.065314  | 3.50    | 0.0009  |
| ln2nd ionization potential (eV) | -0.146517 | 0.058727  | -2.49   | 0.0152  |
| lnMelting Point (C)             | -0.533424 | 0.148791  | -3.59   | 0.0007  |
| lnBoiling Point (C)             | 0.7045971 | 0.175403  | 4.02    | 0.0002  |
| lnCharge                        | 0.4061536 | 0.162733  | 2.50    | 0.0152  |

<sup>106</sup>Pd

**Summary of Fit**

RSquare 0.42429  
RSquare Adj 0.376314  
Root Mean Square Error 0.680023  
Mean of Response 2.721495  
Observations (or Sum Wgts) 79

**Parameter Estimates**

| Term                            | Estimate  | Std Error | t Ratio | Prob> t |
|---------------------------------|-----------|-----------|---------|---------|
| Intercept                       | 2.1202885 | 0.345457  | 6.14    | <.0001  |
| lnMass                          | 0.3797827 | 0.081083  | 4.68    | <.0001  |
| ln1st ionization potential (eV) | -0.4887   | 0.115137  | -4.24   | <.0001  |
| ln2nd ionization potential (eV) | 0.373774  | 0.093964  | 3.98    | 0.0002  |
| lnHeat Capacity (J/molK)        | -0.125085 | 0.068205  | -1.83   | 0.0708  |
| lnS (J/Kmol)                    | -0.283534 | 0.086259  | -3.29   | 0.0016  |
| lnCharge                        | -0.458335 | 0.220212  | -2.08   | 0.0410  |

<sup>109</sup>Ag

**Summary of Fit**

RSquare 0.156258  
RSquare Adj 0.117465  
Root Mean Square Error 0.671856  
Mean of Response 2.205683  
Observations (or Sum Wgts) 92

**Parameter Estimates**

| Term      | Estimate  | Std Error | t Ratio | Prob> t |
|-----------|-----------|-----------|---------|---------|
| Intercept | 10.440462 | 5.113007  | 2.04    | 0.0442  |

Supplementary Material (ESI) for Journal of Analytical Atomic Spectrometry  
 This journal is © The Royal Society of Chemistry 2008

| Term                      | Estimate  | Std Error | t Ratio | Prob> t |
|---------------------------|-----------|-----------|---------|---------|
| lnBoiling Point (C)       | 0.4524281 | 0.142923  | 3.17    | 0.0021  |
| lnH of form (kJ/mol)      | -0.241545 | 0.124083  | -1.95   | 0.0548  |
| lnion mobility (C/Pa*s*A) | 0.3145819 | 0.158338  | 1.99    | 0.0501  |
| lnCharge                  | -0.558848 | 0.256981  | -2.17   | 0.0324  |

*<sup>114</sup>Cd*

**Summary of Fit**

|                            |          |
|----------------------------|----------|
| RSquare                    | 0.190184 |
| RSquare Adj                | 0.164061 |
| Root Mean Square Error     | 0.668079 |
| Mean of Response           | 1.743512 |
| Observations (or Sum Wgts) | 97       |

**Parameter Estimates**

| Term                 | Estimate  | Std Error | t Ratio | Prob> t |
|----------------------|-----------|-----------|---------|---------|
| Intercept            | 2.6834962 | 0.610416  | 4.40    | <.0001  |
| lnMass               | 0.2075843 | 0.074359  | 2.79    | 0.0064  |
| lnBoiling Point (C)  | -0.583631 | 0.15617   | -3.74   | 0.0003  |
| lnG of form (kJ/mol) | 0.48939   | 0.159557  | 3.07    | 0.0028  |

*<sup>115</sup>In*

**Summary of Fit**

|                            |          |
|----------------------------|----------|
| RSquare                    | 0.169597 |
| RSquare Adj                | 0.143095 |
| Root Mean Square Error     | 0.577628 |
| Mean of Response           | 2.046705 |
| Observations (or Sum Wgts) | 98       |

**Parameter Estimates**

| Term                     | Estimate  | Std Error | t Ratio | Prob> t |
|--------------------------|-----------|-----------|---------|---------|
| Intercept                | 1.9615055 | 0.415377  | 4.72    | <.0001  |
| lnMass                   | 0.1954605 | 0.062892  | 3.11    | 0.0025  |
| lnMelting Point (C)      | -0.099746 | 0.057798  | -1.73   | 0.0877  |
| lnHeat Capacity (J/molK) | 0.1878025 | 0.068106  | 2.76    | 0.0070  |

*<sup>120</sup>Sn*

**Summary of Fit**

|                            |          |
|----------------------------|----------|
| RSquare                    | 0.335356 |
| RSquare Adj                | 0.285508 |
| Root Mean Square Error     | 0.65104  |
| Mean of Response           | 1.632055 |
| Observations (or Sum Wgts) | 87       |

**Parameter Estimates**

| Term                      | Estimate  | Std Error | t Ratio | Prob> t |
|---------------------------|-----------|-----------|---------|---------|
| Intercept                 | -1.285401 | 3.620246  | -0.36   | 0.7235  |
| lnMelting Point (C)       | -0.361526 | 0.070934  | -5.10   | <.0001  |
| lnBoiling Point (C)       | -0.21498  | 0.097561  | -2.20   | 0.0304  |
| lnHeat Capacity (J/molK)  | 0.2224624 | 0.084827  | 2.62    | 0.0104  |
| lnS (J/Kmol)              | 0.2096006 | 0.075923  | 2.76    | 0.0071  |
| lnion mobility (C/Pa*s*A) | -0.186232 | 0.102004  | -1.83   | 0.0716  |
| lnCharge                  | 0.5367236 | 0.1682    | 3.19    | 0.0020  |

*<sup>121</sup>Sb*

**Summary of Fit**

|                            |          |
|----------------------------|----------|
| RSquare                    | 0.360896 |
| RSquare Adj                | 0.317122 |
| Root Mean Square Error     | 0.373328 |
| Mean of Response           | 2.59103  |
| Observations (or Sum Wgts) | 79       |

### Parameter Estimates

| Term                            | Estimate  | Std Error | t Ratio | Prob> t |
|---------------------------------|-----------|-----------|---------|---------|
| Intercept                       | 20.262292 | 5.30535   | 3.82    | 0.0003  |
| ln1st ionization potential (eV) | -0.267932 | 0.092336  | -2.90   | 0.0049  |
| ln2nd ionization potential (eV) | 0.1580005 | 0.041327  | 3.82    | 0.0003  |
| lnBoiling Point (C)             | -0.133403 | 0.037904  | -3.52   | 0.0007  |
| ln ion mobility (C/Pa*s*A)      | 0.5164141 | 0.162018  | 3.19    | 0.0021  |
| lnCharge                        | -0.750015 | 0.231898  | -3.23   | 0.0018  |

<sup>130</sup>Te

### Summary of Fit

|                            |          |
|----------------------------|----------|
| RSquare                    | 0.091216 |
| RSquare Adj                | 0.081749 |
| Root Mean Square Error     | 0.54864  |
| Mean of Response           | 2.280585 |
| Observations (or Sum Wgts) | 98       |

### Parameter Estimates

| Term      | Estimate  | Std Error | t Ratio | Prob> t |
|-----------|-----------|-----------|---------|---------|
| Intercept | 1.4928685 | 0.259745  | 5.75    | <.0001  |
| lnMass    | 0.2147405 | 0.069179  | 3.10    | 0.0025  |

<sup>133</sup>Cs

### Summary of Fit

|                            |          |
|----------------------------|----------|
| RSquare                    | 0.463886 |
| RSquare Adj                | 0.412828 |
| Root Mean Square Error     | 0.589668 |
| Mean of Response           | 1.720068 |
| Observations (or Sum Wgts) | 93       |

### Parameter Estimates

| Term                       | Estimate  | Std Error | t Ratio | Prob> t |
|----------------------------|-----------|-----------|---------|---------|
| Intercept                  | -11.7824  | 4.783835  | -2.46   | 0.0158  |
| lnMass                     | 0.1913543 | 0.083301  | 2.30    | 0.0241  |
| lnMelting Point (C)        | 0.1455403 | 0.060795  | 2.39    | 0.0189  |
| lnBoiling Point (C)        | -0.112065 | 0.100698  | -1.11   | 0.2689  |
| lnHeat Capacity (J/molK)   | 1.5445731 | 0.27067   | 5.71    | <.0001  |
| lnH of form (kJ/mol)       | -0.280359 | 0.145927  | -1.92   | 0.0581  |
| lnS (J/Kmol)               | -0.127847 | 0.059993  | -2.13   | 0.0360  |
| ln ion mobility (C/Pa*s*A) | -0.354988 | 0.143346  | -2.48   | 0.0153  |
| lnCharge                   | 1.1206005 | 0.278334  | 4.03    | 0.0001  |

<sup>138</sup>Ba

### Summary of Fit

|                            |          |
|----------------------------|----------|
| RSquare                    | 0.380937 |
| RSquare Adj                | 0.353114 |
| Root Mean Square Error     | 0.697056 |
| Mean of Response           | 1.561385 |
| Observations (or Sum Wgts) | 94       |

### Parameter Estimates

| Term                | Estimate  | Std Error | t Ratio | Prob> t |
|---------------------|-----------|-----------|---------|---------|
| Intercept           | 0.9802011 | 0.688743  | 1.42    | 0.1582  |
| lnMass              | 0.3215792 | 0.103556  | 3.11    | 0.0025  |
| lnMelting Point (C) | -0.409057 | 0.092201  | -4.44   | <.0001  |
| lnBoiling Point (C) | 0.3434056 | 0.089408  | 3.84    | 0.0002  |
| lnElectronegativity | 0.3334926 | 0.098715  | 3.38    | 0.0011  |

<sup>140</sup>Ce

### Summary of Fit

|             |          |
|-------------|----------|
| RSquare     | 0.467778 |
| RSquare Adj | 0.424956 |

Supplementary Material (ESI) for Journal of Analytical Atomic Spectrometry  
This journal is © The Royal Society of Chemistry 2008

Root Mean Square Error 0.46431  
Mean of Response 2.001917  
Observations (or Sum Wgts) 95

**Parameter Estimates**

| Term                            | Estimate  | Std Error | t Ratio | Prob> t |
|---------------------------------|-----------|-----------|---------|---------|
| Intercept                       | 3.5186305 | 0.565961  | 6.22    | <.0001  |
| lnMass                          | 0.1183028 | 0.070141  | 1.69    | 0.0953  |
| ln1st ionization potential (eV) | -0.126721 | 0.067843  | -1.87   | 0.0651  |
| ln2nd ionization potential (eV) | 0.2272277 | 0.067988  | 3.34    | 0.0012  |
| lnMelting Point (C)             | -0.279163 | 0.055443  | -5.04   | <.0001  |
| lnHeat Capacity (J/molK)        | 0.1665492 | 0.048562  | 3.43    | 0.0009  |
| lnG of form (kJ/mol)            | -0.15034  | 0.059188  | -2.54   | 0.0129  |
| lnS (J/Kmol)                    | 0.0994303 | 0.050946  | 1.95    | 0.0542  |

*<sup>152</sup>Sm*

**Summary of Fit**

RSquare 0.27597  
RSquare Adj 0.25988  
Root Mean Square Error 0.719181  
Mean of Response 1.646178  
Observations (or Sum Wgts) 93

**Parameter Estimates**

| Term                      | Estimate  | Std Error | t Ratio | Prob> t |
|---------------------------|-----------|-----------|---------|---------|
| Intercept                 | 4.6216513 | 2.409021  | 1.92    | 0.0582  |
| lnMass                    | 0.423714  | 0.091043  | 4.65    | <.0001  |
| Inion mobility (C/Pa*s*A) | 0.1422599 | 0.070943  | 2.01    | 0.0479  |

*<sup>153</sup>Eu*

**Summary of Fit**

RSquare 0.31139  
RSquare Adj 0.296739  
Root Mean Square Error 0.645339  
Mean of Response 1.757023  
Observations (or Sum Wgts) 97

**Parameter Estimates**

| Term                      | Estimate  | Std Error | t Ratio | Prob> t |
|---------------------------|-----------|-----------|---------|---------|
| Intercept                 | 5.1995595 | 2.128604  | 2.44    | 0.0164  |
| lnMass                    | 0.3252886 | 0.0778    | 4.18    | <.0001  |
| Inion mobility (C/Pa*s*A) | 0.1438107 | 0.061147  | 2.35    | 0.0208  |

*<sup>159</sup>Tb*

**Summary of Fit**

RSquare 0.231951  
RSquare Adj 0.184686  
Root Mean Square Error 0.546323  
Mean of Response 1.985917  
Observations (or Sum Wgts) 70

**Parameter Estimates**

| Term                | Estimate  | Std Error | t Ratio | Prob> t |
|---------------------|-----------|-----------|---------|---------|
| Intercept           | -0.197563 | 1.039653  | -0.19   | 0.8499  |
| lnMass              | 0.4012364 | 0.137692  | 2.91    | 0.0049  |
| lnMelting Point (C) | -0.212222 | 0.126638  | -1.68   | 0.0986  |
| lnBoiling Point (C) | 0.2667034 | 0.114135  | 2.34    | 0.0225  |
| lnCharge            | 0.2815469 | 0.138718  | 2.03    | 0.0465  |

*<sup>166</sup>Er*

**Summary of Fit**

RSquare 0.220755

Supplementary Material (ESI) for Journal of Analytical Atomic Spectrometry  
This journal is © The Royal Society of Chemistry 2008

RSquare Adj 0.172802  
Root Mean Square Error 0.633202  
Mean of Response 1.728746  
Observations (or Sum Wgts) 70

**Parameter Estimates**

| Term                            | Estimate  | Std Error | t Ratio | Prob> t |
|---------------------------------|-----------|-----------|---------|---------|
| Intercept                       | -0.085946 | 0.514919  | -0.17   | 0.8680  |
| lnMass                          | 0.2682788 | 0.135278  | 1.98    | 0.0516  |
| ln1st ionization potential (eV) | -0.146284 | 0.087383  | -1.67   | 0.0989  |
| lnS (J/Kmol)                    | 0.2298593 | 0.115109  | 2.00    | 0.0500  |
| lnCharge                        | 0.4961436 | 0.178194  | 2.78    | 0.0070  |

<sup>178</sup>Hf

**Summary of Fit**

RSquare 0.367732  
RSquare Adj 0.309497  
Root Mean Square Error 0.605333  
Mean of Response 2.460062  
Observations (or Sum Wgts) 84

**Parameter Estimates**

| Term                            | Estimate  | Std Error | t Ratio | Prob> t |
|---------------------------------|-----------|-----------|---------|---------|
| Intercept                       | -7.310603 | 2.899015  | -2.52   | 0.0138  |
| lnMass                          | -0.200112 | 0.086295  | -2.32   | 0.0231  |
| ln1st ionization potential (eV) | -0.265275 | 0.085092  | -3.12   | 0.0026  |
| ln2nd ionization potential (eV) | 0.1912007 | 0.062489  | 3.06    | 0.0031  |
| lnDG of form (kJ/mol)           | 0.2582268 | 0.085624  | 3.02    | 0.0035  |
| lnElectronegativity             | 0.5364382 | 0.137935  | 3.89    | 0.0002  |
| Inion mobility (C/Pa*s*A)       | -0.302616 | 0.090966  | -3.33   | 0.0014  |
| lnCharge                        | 0.3066988 | 0.155677  | 1.97    | 0.0525  |

<sup>184</sup>W

**Summary of Fit**

RSquare 0.579202  
RSquare Adj 0.55038  
Root Mean Square Error 0.399865  
Mean of Response 1.926882  
Observations (or Sum Wgts) 79

**Parameter Estimates**

| Term                            | Estimate  | Std Error | t Ratio | Prob> t |
|---------------------------------|-----------|-----------|---------|---------|
| Intercept                       | 35.775031 | 5.114025  | 7.00    | <.0001  |
| ln1st ionization potential (eV) | -0.1056   | 0.057192  | -1.85   | 0.0689  |
| ln2nd ionization potential (eV) | 0.1091002 | 0.060087  | 1.82    | 0.0735  |
| lnDH of form (kJ/mol)           | 0.8071554 | 0.134382  | 6.01    | <.0001  |
| lnCharge                        | -1.750615 | 0.233759  | -7.49   | <.0001  |
| Inion mobility (C/Pa*s*A)       | 1.1982589 | 0.165677  | 7.23    | <.0001  |

<sup>192</sup>Os

**Summary of Fit**

RSquare 0.263283  
RSquare Adj 0.233815  
Root Mean Square Error 0.610455  
Mean of Response 1.689834  
Observations (or Sum Wgts) 79

**Parameter Estimates**

| Term                            | Estimate  | Std Error | t Ratio | Prob> t |
|---------------------------------|-----------|-----------|---------|---------|
| Intercept                       | 10.25953  | 4.127228  | 2.49    | 0.0152  |
| ln2nd ionization potential (eV) | 1.0849811 | 0.23262   | 4.66    | <.0001  |
| lnDH of form (kJ/mol)           | 0.3036459 | 0.167748  | 1.81    | 0.0743  |
| Inion mobility (C/Pa*s*A)       | 0.4287041 | 0.147593  | 2.90    | 0.0048  |

<sup>193</sup>Ir

**Summary of Fit**

|                            |          |
|----------------------------|----------|
| RSquare                    | 0.351609 |
| RSquare Adj                | 0.325674 |
| Root Mean Square Error     | 0.607113 |
| Mean of Response           | 1.829837 |
| Observations (or Sum Wgts) | 79       |

**Parameter Estimates**

| Term                            | Estimate  | Std Error | t Ratio | Prob> t |
|---------------------------------|-----------|-----------|---------|---------|
| Intercept                       | 7.0896519 | 4.065507  | 1.74    | 0.0853  |
| lnMass                          | 0.3101802 | 0.077305  | 4.01    | 0.0001  |
| ln2nd ionization potential (eV) | 0.8101554 | 0.236267  | 3.43    | 0.0010  |
| ln ion mobility (C/Pa*s*A)      | 0.280107  | 0.130777  | 2.14    | 0.0355  |

<sup>195</sup>Pt

**Summary of Fit**

|                            |          |
|----------------------------|----------|
| RSquare                    | 0.553388 |
| RSquare Adj                | 0.527117 |
| Root Mean Square Error     | 0.439187 |
| Mean of Response           | 1.824471 |
| Observations (or Sum Wgts) | 73       |

**Parameter Estimates**

| Term                       | Estimate  | Std Error | t Ratio | Prob> t |
|----------------------------|-----------|-----------|---------|---------|
| Intercept                  | 31.680466 | 7.717228  | 4.11    | 0.0001  |
| lnMass                     | 0.3009236 | 0.094357  | 3.19    | 0.0022  |
| lnElectronegativity        | 0.1583471 | 0.053036  | 2.99    | 0.0039  |
| ln ion mobility (C/Pa*s*A) | 0.9447048 | 0.228213  | 4.14    | <.0001  |
| lnCharge                   | -1.575996 | 0.368966  | -4.27   | <.0001  |

<sup>197</sup>Au

**Summary of Fit**

|                            |          |
|----------------------------|----------|
| RSquare                    | 0.553388 |
| RSquare Adj                | 0.527117 |
| Root Mean Square Error     | 0.439187 |
| Mean of Response           | 1.824471 |
| Observations (or Sum Wgts) | 73       |

**Parameter Estimates**

| Term                       | Estimate  | Std Error | t Ratio | Prob> t |
|----------------------------|-----------|-----------|---------|---------|
| Intercept                  | 31.680466 | 7.717228  | 4.11    | 0.0001  |
| lnMass                     | 0.3009236 | 0.094357  | 3.19    | 0.0022  |
| lnElectronegativity        | 0.1583471 | 0.053036  | 2.99    | 0.0039  |
| ln ion mobility (C/Pa*s*A) | 0.9447048 | 0.228213  | 4.14    | <.0001  |
| lnCharge                   | -1.575996 | 0.368966  | -4.27   | <.0001  |

<sup>202</sup>Hg

**Summary of Fit**

|                            |          |
|----------------------------|----------|
| RSquare                    | 0.286197 |
| RSquare Adj                | 0.240145 |
| Root Mean Square Error     | 0.445281 |
| Mean of Response           | 2.422536 |
| Observations (or Sum Wgts) | 67       |

**Parameter Estimates**

| Term                            | Estimate  | Std Error | t Ratio | Prob> t |
|---------------------------------|-----------|-----------|---------|---------|
| Intercept                       | 2.4256801 | 0.327309  | 7.41    | <.0001  |
| lnMass                          | 0.1102709 | 0.054469  | 2.02    | 0.0472  |
| ln1st ionization potential (eV) | -0.370702 | 0.151782  | -2.44   | 0.0175  |
| lnS (J/Kmol)                    | 0.140557  | 0.053937  | 2.61    | 0.0115  |
| lnCharge                        | -0.823813 | 0.21557   | -3.82   | 0.0003  |

<sup>205</sup>Tl

**Summary of Fit**

RSquare 0.277815  
 RSquare Adj 0.253471  
 Root Mean Square Error 0.560931  
 Mean of Response 1.982076  
 Observations (or Sum Wgts) 93

**Parameter Estimates**

| Term                            | Estimate  | Std Error | t Ratio | Prob> t |
|---------------------------------|-----------|-----------|---------|---------|
| Intercept                       | 6.2074603 | 2.160512  | 2.87    | 0.0051  |
| InMass                          | 0.2658571 | 0.056726  | 4.69    | <.0001  |
| In1st ionization potential (eV) | 0.0732958 | 0.031618  | 2.32    | 0.0227  |
| Inion mobility (C/Pa*s*A)       | 0.1652788 | 0.066877  | 2.47    | 0.0154  |

<sup>208</sup>Pb

**Summary of Fit**

RSquare 0.367515  
 RSquare Adj 0.321516  
 Root Mean Square Error 0.524967  
 Mean of Response 1.951681  
 Observations (or Sum Wgts) 60

**Parameter Estimates**

| Term                     | Estimate  | Std Error | t Ratio | Prob> t |
|--------------------------|-----------|-----------|---------|---------|
| Intercept                | 0.0794694 | 0.505216  | 0.16    | 0.8756  |
| InMass                   | 0.4473019 | 0.100768  | 4.44    | <.0001  |
| InHeat Capacity (J/molK) | 0.1567524 | 0.086003  | 1.82    | 0.0738  |
| InElectronegativity      | 0.132371  | 0.061569  | 2.15    | 0.0360  |
| InCharge                 | 0.3757269 | 0.165558  | 2.27    | 0.0272  |

<sup>209</sup>Bi

**Summary of Fit**

RSquare 0.18944  
 RSquare Adj 0.172008  
 Root Mean Square Error 0.647108  
 Mean of Response 1.891913  
 Observations (or Sum Wgts) 96

**Parameter Estimates**

| Term                     | Estimate  | Std Error | t Ratio | Prob> t |
|--------------------------|-----------|-----------|---------|---------|
| Intercept                | 0.9011904 | 0.267307  | 3.37    | 0.0011  |
| InMass                   | 0.2299617 | 0.063356  | 3.63    | 0.0005  |
| InHeat Capacity (J/molK) | 0.1864344 | 0.072541  | 2.57    | 0.0118  |

<sup>232</sup>Th

**Summary of Fit**

RSquare 0.611075  
 RSquare Adj 0.58069  
 Root Mean Square Error 0.215097  
 Mean of Response 2.561924  
 Observations (or Sum Wgts) 70

**Parameter Estimates**

| Term                            | Estimate  | Std Error | t Ratio | Prob> t |
|---------------------------------|-----------|-----------|---------|---------|
| Intercept                       | -0.022465 | 0.749631  | -0.03   | 0.9762  |
| InMass                          | 0.139083  | 0.023112  | 6.02    | <.0001  |
| In2nd ionization potential (eV) | 0.0773132 | 0.020118  | 3.84    | 0.0003  |
| IndG of form (kJ/mol)           | -0.149531 | 0.023055  | -6.49   | <.0001  |
| Inion mobility (C/Pa*s*A)       | -0.080966 | 0.023481  | -3.45   | 0.0010  |
| InCharge                        | 0.2368441 | 0.064746  | 3.66    | 0.0005  |

<sup>238</sup>U

### Summary of Fit

|                            |          |
|----------------------------|----------|
| RSquare                    | 0.576045 |
| RSquare Adj                | 0.542129 |
| Root Mean Square Error     | 0.369203 |
| Mean of Response           | 2.168641 |
| Observations (or Sum Wgts) | 82       |

### Parameter Estimates

| Term                      | Estimate  | Std Error | t Ratio | Prob> t |
|---------------------------|-----------|-----------|---------|---------|
| Intercept                 | 5.4103483 | 2.633301  | 2.05    | 0.0434  |
| InMass                    | 0.4588053 | 0.074147  | 6.19    | <.0001  |
| InHeat Capacity (J/molK)  | 0.1686541 | 0.069056  | 2.44    | 0.0169  |
| IndG of form (kJ/mol)     | 0.2021182 | 0.058318  | 3.47    | 0.0009  |
| InElectronegativity       | 0.1559187 | 0.050004  | 3.12    | 0.0026  |
| Inion mobility (C/Pa*s*A) | 0.1923159 | 0.082385  | 2.33    | 0.0223  |
| InCharge                  | -0.297809 | 0.116629  | -2.55   | 0.0127  |

## NaCl

<sup>7</sup>Li

### Summary of Fit

|                            |          |
|----------------------------|----------|
| RSquare                    | 0.344876 |
| RSquare Adj                | 0.329987 |
| Root Mean Square Error     | 0.757373 |
| Mean of Response           | 2.414656 |
| Observations (or Sum Wgts) | 91       |

### Parameter Estimates

| Term                  | Estimate  | Std Error | t Ratio | Prob> t |
|-----------------------|-----------|-----------|---------|---------|
| Intercept             | 5.0083428 | 0.410816  | 12.19   | <.0001  |
| IndH of form (kJ/mol) | -0.410603 | 0.072423  | -5.67   | <.0001  |
| InElectronegativity   | 0.5355441 | 0.099764  | 5.37    | <.0001  |

<sup>9</sup>Be

### Summary of Fit

|                            |          |
|----------------------------|----------|
| RSquare                    | 0.209916 |
| RSquare Adj                | 0.1847   |
| Root Mean Square Error     | 0.895693 |
| Mean of Response           | 2.321309 |
| Observations (or Sum Wgts) | 98       |

### Parameter Estimates

| Term                            | Estimate  | Std Error | t Ratio | Prob> t |
|---------------------------------|-----------|-----------|---------|---------|
| Intercept                       | 7.0884642 | 1.026019  | 6.91    | <.0001  |
| In1st ionization potential (eV) | -0.267987 | 0.104826  | -2.56   | 0.0122  |
| InBoiling Point (C)             | -0.278707 | 0.107652  | -2.59   | 0.0112  |
| InS (J/Kmol)                    | -0.751144 | 0.212687  | -3.53   | 0.0006  |

<sup>11</sup>B

### Summary of Fit

|                            |          |
|----------------------------|----------|
| RSquare                    | 0.266881 |
| RSquare Adj                | 0.243483 |
| Root Mean Square Error     | 0.744114 |
| Mean of Response           | 2.647933 |
| Observations (or Sum Wgts) | 98       |

### Parameter Estimates

| Term                            | Estimate  | Std Error | t Ratio | Prob> t |
|---------------------------------|-----------|-----------|---------|---------|
| Intercept                       | -18.46071 | 13.30987  | -1.39   | 0.1687  |
| In1st ionization potential (eV) | -0.243024 | 0.084612  | -2.87   | 0.0050  |
| InS (J/Kmol)                    | -0.663931 | 0.137495  | -4.83   | <.0001  |
| Inion mobility (C/Pa*s*A)       | -0.774676 | 0.443766  | -1.75   | 0.0841  |



<sup>26</sup>Mg

### Summary of Fit

|                            |          |
|----------------------------|----------|
| RSquare                    | 0.195152 |
| RSquare Adj                | 0.186768 |
| Root Mean Square Error     | 0.440041 |
| Mean of Response           | 4.589259 |
| Observations (or Sum Wgts) | 98       |

### Parameter Estimates

| Term      | Estimate  | Std Error | t Ratio | Prob> t |
|-----------|-----------|-----------|---------|---------|
| Intercept | 3.6533003 | 0.199023  | 18.36   | <.0001  |
| InMass    | 0.2166487 | 0.044905  | 4.82    | <.0001  |

<sup>27</sup>Al

### Summary of Fit

|                            |          |
|----------------------------|----------|
| RSquare                    | 0        |
| RSquare Adj                | -2.2e-16 |
| Root Mean Square Error     | 0.378466 |
| Mean of Response           | 3.679815 |
| Observations (or Sum Wgts) | 98       |

### Parameter Estimates

| Term      | Estimate  | Std Error | t Ratio | Prob> t |
|-----------|-----------|-----------|---------|---------|
| Intercept | 3.6798153 | 0.038231  | 96.25   | <.0001  |

<sup>44</sup>Ca

### Summary of Fit

|                            |          |
|----------------------------|----------|
| RSquare                    | 0.27736  |
| RSquare Adj                | 0.262146 |
| Root Mean Square Error     | 0.442307 |
| Mean of Response           | 4.528927 |
| Observations (or Sum Wgts) | 98       |

### Parameter Estimates

| Term         | Estimate  | Std Error | t Ratio | Prob> t |
|--------------|-----------|-----------|---------|---------|
| Intercept    | 2.9470145 | 0.276533  | 10.66   | <.0001  |
| InMass       | 0.1829002 | 0.050554  | 3.62    | 0.0005  |
| InS (J/Kmol) | 0.2711671 | 0.091367  | 2.97    | 0.0038  |

<sup>45</sup>Sc

### Summary of Fit

|                            |          |
|----------------------------|----------|
| RSquare                    | 0.227722 |
| RSquare Adj                | 0.211463 |
| Root Mean Square Error     | 0.939909 |
| Mean of Response           | 2.225251 |
| Observations (or Sum Wgts) | 98       |

### Parameter Estimates

| Term                | Estimate  | Std Error | t Ratio | Prob> t |
|---------------------|-----------|-----------|---------|---------|
| Intercept           | 2.9568117 | 0.539956  | 5.48    | <.0001  |
| InMass              | -0.476612 | 0.097654  | -4.88   | <.0001  |
| InMelting Point (C) | 0.198284  | 0.069179  | 2.87    | 0.0051  |

<sup>48</sup>Ti

### Summary of Fit

|                            |          |
|----------------------------|----------|
| RSquare                    | 0        |
| RSquare Adj                | 0        |
| Root Mean Square Error     | 0.890924 |
| Mean of Response           | 2.771921 |
| Observations (or Sum Wgts) | 98       |

### Parameter Estimates

| Term      | Estimate | Std Error | t Ratio | Prob> t |
|-----------|----------|-----------|---------|---------|
| Intercept | 2.771921 | 0.089997  | 30.80   | <.0001  |

<sup>51</sup>V

### Summary of Fit

|                            |          |
|----------------------------|----------|
| RSquare                    | 0.224819 |
| RSquare Adj                | 0.208499 |
| Root Mean Square Error     | 0.476293 |
| Mean of Response           | 4.274511 |
| Observations (or Sum Wgts) | 98       |

### Parameter Estimates

| Term         | Estimate  | Std Error | t Ratio | Prob> t |
|--------------|-----------|-----------|---------|---------|
| Intercept    | 3.6578678 | 0.195645  | 18.70   | <.0001  |
| InMass       | 0.2032919 | 0.044367  | 4.58    | <.0001  |
| InS (J/Kmol) | -0.107091 | 0.040052  | -2.67   | 0.0088  |

<sup>52</sup>Cr

### Summary of Fit

|                            |          |
|----------------------------|----------|
| RSquare                    | 0.537077 |
| RSquare Adj                | 0.51695  |
| Root Mean Square Error     | 0.586393 |
| Mean of Response           | 2.392447 |
| Observations (or Sum Wgts) | 97       |

### Parameter Estimates

| Term                | Estimate  | Std Error | t Ratio | Prob> t |
|---------------------|-----------|-----------|---------|---------|
| Intercept           | 1.5836025 | 0.440988  | 3.59    | 0.0005  |
| InMass              | -0.519643 | 0.060247  | -8.63   | <.0001  |
| InMelting Point (C) | 0.3090975 | 0.060838  | 5.08    | <.0001  |
| InS (J/Kmol)        | 0.1614323 | 0.053116  | 3.04    | 0.0031  |
| InElectronegativity | -0.350481 | 0.059758  | -5.87   | <.0001  |

<sup>55</sup>Mn

### Summary of Fit

|                            |          |
|----------------------------|----------|
| RSquare                    | 0.437736 |
| RSquare Adj                | 0.391649 |
| Root Mean Square Error     | 0.093904 |
| Mean of Response           | 4.972762 |
| Observations (or Sum Wgts) | 67       |

### Parameter Estimates

| Term                            | Estimate  | Std Error | t Ratio | Prob> t |
|---------------------------------|-----------|-----------|---------|---------|
| Intercept                       | 3.7915037 | 0.473793  | 8.00    | <.0001  |
| InMass                          | 0.0633708 | 0.012535  | 5.06    | <.0001  |
| In2nd ionization potential (eV) | 0.02585   | 0.012959  | 1.99    | 0.0505  |
| In dG of form (kJ/mol)          | -0.024526 | 0.009519  | -2.58   | 0.0124  |
| In ion mobility (C/Pa*s*A)      | -0.030574 | 0.014416  | -2.12   | 0.0380  |
| InCharge                        | 0.1044748 | 0.041192  | 2.54    | 0.0138  |

<sup>57</sup>Fe

### Summary of Fit

|                            |          |
|----------------------------|----------|
| RSquare                    | 0        |
| RSquare Adj                | 0        |
| Root Mean Square Error     | 0.57837  |
| Mean of Response           | 3.411559 |
| Observations (or Sum Wgts) | 98       |

### Parameter Estimates

| Term      | Estimate  | Std Error | t Ratio | Prob> t |
|-----------|-----------|-----------|---------|---------|
| Intercept | 3.4115595 | 0.058424  | 58.39   | <.0001  |

<sup>58</sup>Ni

**Summary of Fit**

|                            |          |
|----------------------------|----------|
| RSquare                    | 0.279465 |
| RSquare Adj                | 0.255711 |
| Root Mean Square Error     | 0.690832 |
| Mean of Response           | 2.652603 |
| Observations (or Sum Wgts) | 95       |

**Parameter Estimates**

| Term                            | Estimate  | Std Error | t Ratio | Prob> t |
|---------------------------------|-----------|-----------|---------|---------|
| Intercept                       | 2.3131363 | 0.12573   | 18.40   | <.0001  |
| In1st ionization potential (eV) | -0.210966 | 0.058761  | -3.59   | 0.0005  |
| InHeat Capacity (J/molK)        | -0.134278 | 0.06483   | -2.07   | 0.0412  |
| InElectronegativity             | -0.258871 | 0.095439  | -2.71   | 0.0080  |

<sup>59</sup>Co

**Summary of Fit**

|                            |          |
|----------------------------|----------|
| RSquare                    | 0.399389 |
| RSquare Adj                | 0.359788 |
| Root Mean Square Error     | 0.888643 |
| Mean of Response           | 2.177884 |
| Observations (or Sum Wgts) | 98       |

**Parameter Estimates**

| Term                            | Estimate  | Std Error | t Ratio | Prob> t |
|---------------------------------|-----------|-----------|---------|---------|
| Intercept                       | -4.79907  | 2.722678  | -1.76   | 0.0813  |
| InMass                          | -0.316486 | 0.092585  | -3.42   | 0.0009  |
| In1st ionization potential (eV) | -0.2214   | 0.084354  | -2.62   | 0.0102  |
| InMelting Point (C)             | 0.5137515 | 0.150736  | 3.41    | 0.0010  |
| InBoiling Point (C)             | -0.242368 | 0.138718  | -1.75   | 0.0840  |
| InS (J/Kmol)                    | 0.1763828 | 0.087174  | 2.02    | 0.0460  |
| Inion mobility (C/Pa*s*A)       | -0.193326 | 0.08112   | -2.38   | 0.0192  |

<sup>63</sup>Cu

**Summary of Fit**

|                            |          |
|----------------------------|----------|
| RSquare                    | 0.306977 |
| RSquare Adj                | 0.292232 |
| Root Mean Square Error     | 0.386932 |
| Mean of Response           | 4.450294 |
| Observations (or Sum Wgts) | 97       |

**Parameter Estimates**

| Term                      | Estimate  | Std Error | t Ratio | Prob> t |
|---------------------------|-----------|-----------|---------|---------|
| Intercept                 | 6.8240248 | 1.130925  | 6.03    | <.0001  |
| InMass                    | 0.1841181 | 0.038697  | 4.76    | <.0001  |
| Inion mobility (C/Pa*s*A) | 0.0956435 | 0.033399  | 2.86    | 0.0052  |

<sup>64</sup>Zn

**Summary of Fit**

|                            |          |
|----------------------------|----------|
| RSquare                    | 0.179392 |
| RSquare Adj                | 0.140315 |
| Root Mean Square Error     | 0.381206 |
| Mean of Response           | 4.389155 |
| Observations (or Sum Wgts) | 67       |

**Parameter Estimates**

| Term                  | Estimate  | Std Error | t Ratio | Prob> t |
|-----------------------|-----------|-----------|---------|---------|
| Intercept             | 4.4693168 | 0.405304  | 11.03   | <.0001  |
| InMass                | 0.1253524 | 0.05557   | 2.26    | 0.0276  |
| IndH of form (kJ/mol) | -0.13429  | 0.066781  | -2.01   | 0.0486  |
| InCharge              | 0.3909234 | 0.166729  | 2.34    | 0.0222  |

<sup>69</sup>Ga

**Summary of Fit**

|                            |          |
|----------------------------|----------|
| RSquare                    | 0.393687 |
| RSquare Adj                | 0.334049 |
| Root Mean Square Error     | 0.732523 |
| Mean of Response           | 2.628576 |
| Observations (or Sum Wgts) | 68       |

**Parameter Estimates**

| Term                            | Estimate  | Std Error | t Ratio | Prob> t |
|---------------------------------|-----------|-----------|---------|---------|
| Intercept                       | 22.844634 | 6.193244  | 3.69    | 0.0005  |
| ln1st ionization potential (eV) | -0.638199 | 0.17123   | -3.73   | 0.0004  |
| lnBoiling Point (C)             | 0.7821638 | 0.221949  | 3.52    | 0.0008  |
| lnG of form (kJ/mol)            | -0.711194 | 0.174708  | -4.08   | 0.0001  |
| lnElectronegativity             | -0.474598 | 0.159094  | -2.98   | 0.0041  |
| Inion mobility (C/Pa*s*A)       | 0.7007255 | 0.206217  | 3.40    | 0.0012  |
| lnCharge                        | -0.917995 | 0.273056  | -3.36   | 0.0013  |

<sup>75</sup>As

**Summary of Fit**

|                            |          |
|----------------------------|----------|
| RSquare                    | 0.275784 |
| RSquare Adj                | 0.236638 |
| Root Mean Square Error     | 0.830729 |
| Mean of Response           | 2.766974 |
| Observations (or Sum Wgts) | 79       |

**Parameter Estimates**

| Term                      | Estimate  | Std Error | t Ratio | Prob> t |
|---------------------------|-----------|-----------|---------|---------|
| Intercept                 | 19.965902 | 7.222932  | 2.76    | 0.0072  |
| lnBoiling Point (C)       | -0.451276 | 0.125058  | -3.61   | 0.0006  |
| lnHeat Capacity (J/molK)  | -0.379731 | 0.096835  | -3.92   | 0.0002  |
| lnG of form (kJ/mol)      | -0.291941 | 0.0961    | -3.04   | 0.0033  |
| Inion mobility (C/Pa*s*A) | 0.3997936 | 0.212934  | 1.88    | 0.0644  |

<sup>76</sup>Se

**Summary of Fit**

|                            |          |
|----------------------------|----------|
| RSquare                    | 0.06359  |
| RSquare Adj                | 0.038948 |
| Root Mean Square Error     | 0.564987 |
| Mean of Response           | 3.212709 |
| Observations (or Sum Wgts) | 79       |

**Parameter Estimates**

| Term                      | Estimate  | Std Error | t Ratio | Prob> t |
|---------------------------|-----------|-----------|---------|---------|
| Intercept                 | 17.323305 | 6.483133  | 2.67    | 0.0092  |
| Inion mobility (C/Pa*s*A) | 0.4332391 | 0.200566  | 2.16    | 0.0339  |
| lnCharge                  | -0.659032 | 0.304176  | -2.17   | 0.0334  |

<sup>85</sup>Rb

**Summary of Fit**

|                            |          |
|----------------------------|----------|
| RSquare                    | 0.475751 |
| RSquare Adj                | 0.439175 |
| Root Mean Square Error     | 0.810304 |
| Mean of Response           | 2.171559 |
| Observations (or Sum Wgts) | 93       |

**Parameter Estimates**

| Term                            | Estimate  | Std Error | t Ratio | Prob> t |
|---------------------------------|-----------|-----------|---------|---------|
| Intercept                       | 4.6429654 | 0.912221  | 5.09    | <.0001  |
| ln1st ionization potential (eV) | -1.018044 | 0.338376  | -3.01   | 0.0034  |
| ln2nd ionization potential (eV) | 0.5509242 | 0.284014  | 1.94    | 0.0557  |
| lnHeat Capacity (J/molK)        | 1.2109517 | 0.28835   | 4.20    | <.0001  |
| lnG of form (kJ/mol)            | -0.681078 | 0.118205  | -5.76   | <.0001  |
| lnElectronegativity             | 0.9548129 | 0.23968   | 3.98    | 0.0001  |

Supplementary Material (ESI) for Journal of Analytical Atomic Spectrometry  
 This journal is © The Royal Society of Chemistry 2008

| Term     | Estimate  | Std Error | t Ratio | Prob> t |
|----------|-----------|-----------|---------|---------|
| InCharge | -0.584887 | 0.243018  | -2.41   | 0.0182  |

<sup>88</sup>Sr

**Summary of Fit**

|                            |          |
|----------------------------|----------|
| RSquare                    | 0.222224 |
| RSquare Adj                | 0.197401 |
| Root Mean Square Error     | 0.776948 |
| Mean of Response           | 2.798967 |
| Observations (or Sum Wgts) | 98       |

**Parameter Estimates**

| Term                  | Estimate  | Std Error | t Ratio | Prob> t |
|-----------------------|-----------|-----------|---------|---------|
| Intercept             | 2.4240363 | 0.464455  | 5.22    | <.0001  |
| InMelting Point (C)   | 0.4249455 | 0.096584  | 4.40    | <.0001  |
| IndH of form (kJ/mol) | -0.357396 | 0.087191  | -4.10   | <.0001  |
| InS (J/Kmol)          | -0.2173   | 0.086128  | -2.52   | 0.0133  |

<sup>89</sup>Y

**Summary of Fit**

|                            |          |
|----------------------------|----------|
| RSquare                    | 0.341694 |
| RSquare Adj                | 0.303861 |
| Root Mean Square Error     | 1.01366  |
| Mean of Response           | 2.108629 |
| Observations (or Sum Wgts) | 93       |

**Parameter Estimates**

| Term                            | Estimate  | Std Error | t Ratio | Prob> t |
|---------------------------------|-----------|-----------|---------|---------|
| Intercept                       | 3.8163843 | 0.615224  | 6.20    | <.0001  |
| In2nd ionization potential (eV) | -0.44387  | 0.174334  | -2.55   | 0.0127  |
| InHeat Capacity (J/molK)        | -0.276462 | 0.134717  | -2.05   | 0.0432  |
| IndH of form (kJ/mol)           | -0.181852 | 0.099376  | -1.83   | 0.0707  |
| InS (J/Kmol)                    | 0.4805012 | 0.104761  | 4.59    | <.0001  |
| InElectronegativity             | 0.7584729 | 0.172193  | 4.40    | <.0001  |

<sup>90</sup>Zr

**Summary of Fit**

|                            |          |
|----------------------------|----------|
| RSquare                    | 0.215537 |
| RSquare Adj                | 0.189676 |
| Root Mean Square Error     | 1.046528 |
| Mean of Response           | 2.120492 |
| Observations (or Sum Wgts) | 95       |

**Parameter Estimates**

| Term                     | Estimate  | Std Error | t Ratio | Prob> t |
|--------------------------|-----------|-----------|---------|---------|
| Intercept                | -0.661666 | 0.823814  | -0.80   | 0.4240  |
| InBoiling Point (C)      | 0.2963314 | 0.106878  | 2.77    | 0.0067  |
| InHeat Capacity (J/molK) | -0.269107 | 0.076506  | -3.52   | 0.0007  |
| InS (J/Kmol)             | 0.3033583 | 0.103878  | 2.92    | 0.0044  |

<sup>102</sup>Ru

**Summary of Fit**

|                            |          |
|----------------------------|----------|
| RSquare                    | 0.271143 |
| RSquare Adj                | 0.236436 |
| Root Mean Square Error     | 0.704134 |
| Mean of Response           | 2.043218 |
| Observations (or Sum Wgts) | 67       |

**Parameter Estimates**

| Term                            | Estimate  | Std Error | t Ratio | Prob> t |
|---------------------------------|-----------|-----------|---------|---------|
| Intercept                       | 2.3832915 | 0.152903  | 15.59   | <.0001  |
| In1st ionization potential (eV) | -0.272911 | 0.079968  | -3.41   | 0.0011  |
| InHeat Capacity (J/molK)        | -0.335686 | 0.106254  | -3.16   | 0.0024  |

Supplementary Material (ESI) for Journal of Analytical Atomic Spectrometry  
 This journal is © The Royal Society of Chemistry 2008

| Term     | Estimate | Std Error | t Ratio | Prob> t |
|----------|----------|-----------|---------|---------|
| InCharge | -0.59378 | 0.275839  | -2.15   | 0.0352  |

<sup>103</sup>Rh

**Summary of Fit**

|                            |          |
|----------------------------|----------|
| RSquare                    | 0.600109 |
| RSquare Adj                | 0.561409 |
| Root Mean Square Error     | 0.569052 |
| Mean of Response           | 2.706194 |
| Observations (or Sum Wgts) | 69       |

**Parameter Estimates**

| Term                            | Estimate  | Std Error | t Ratio | Prob> t |
|---------------------------------|-----------|-----------|---------|---------|
| Intercept                       | 1.7470634 | 0.283775  | 6.16    | <.0001  |
| InMass                          | 0.2118178 | 0.061507  | 3.44    | 0.0010  |
| In1st ionization potential (eV) | -0.193384 | 0.059511  | -3.25   | 0.0019  |
| InHeat Capacity (J/molK)        | -0.196508 | 0.07073   | -2.78   | 0.0072  |
| InS (J/Kmol)                    | 0.3076263 | 0.072499  | 4.24    | <.0001  |
| InElectronegativity             | 0.1429629 | 0.054801  | 2.61    | 0.0114  |
| InCharge                        | -0.726634 | 0.156898  | -4.63   | <.0001  |

<sup>106</sup>Pd

**Summary of Fit**

|                            |          |
|----------------------------|----------|
| RSquare                    | 0.42429  |
| RSquare Adj                | 0.376314 |
| Root Mean Square Error     | 0.680023 |
| Mean of Response           | 2.721495 |
| Observations (or Sum Wgts) | 79       |

**Parameter Estimates**

| Term                            | Estimate  | Std Error | t Ratio | Prob> t |
|---------------------------------|-----------|-----------|---------|---------|
| Intercept                       | 2.1202885 | 0.345457  | 6.14    | <.0001  |
| InMass                          | 0.3797827 | 0.081083  | 4.68    | <.0001  |
| In1st ionization potential (eV) | -0.4887   | 0.115137  | -4.24   | <.0001  |
| In2nd ionization potential (eV) | 0.373774  | 0.093964  | 3.98    | 0.0002  |
| InHeat Capacity (J/molK)        | -0.125085 | 0.068205  | -1.83   | 0.0708  |
| InS (J/Kmol)                    | -0.283534 | 0.086259  | -3.29   | 0.0016  |
| InCharge                        | -0.458335 | 0.220212  | -2.08   | 0.0410  |

<sup>109</sup>Ag

**Summary of Fit**

|                            |          |
|----------------------------|----------|
| RSquare                    | 0.37819  |
| RSquare Adj                | 0.342038 |
| Root Mean Square Error     | 0.792798 |
| Mean of Response           | 2.405896 |
| Observations (or Sum Wgts) | 92       |

**Parameter Estimates**

| Term                            | Estimate  | Std Error | t Ratio | Prob> t |
|---------------------------------|-----------|-----------|---------|---------|
| Intercept                       | 27.358339 | 6.59337   | 4.15    | <.0001  |
| In1st ionization potential (eV) | -0.237737 | 0.08669   | -2.74   | 0.0074  |
| InMelting Point (C)             | -0.372424 | 0.102817  | -3.62   | 0.0005  |
| InHeat Capacity (J/molK)        | -0.141141 | 0.055917  | -2.52   | 0.0134  |
| Inion mobility (C/Pa*s*A)       | 0.7031916 | 0.206844  | 3.40    | 0.0010  |
| InCharge                        | -1.19789  | 0.320285  | -3.74   | 0.0003  |

<sup>114</sup>Cd

**Summary of Fit**

|                        |          |
|------------------------|----------|
| RSquare                | 0.374759 |
| RSquare Adj            | 0.312234 |
| Root Mean Square Error | 0.40507  |
| Mean of Response       | 3.289246 |

Observations (or Sum Wgts) 67

**Parameter Estimates**

| Term                  | Estimate  | Std Error | t Ratio | Prob> t |
|-----------------------|-----------|-----------|---------|---------|
| Intercept             | 3.1727245 | 0.421716  | 7.52    | <.0001  |
| InMass                | -0.145951 | 0.054057  | -2.70   | 0.0090  |
| InMelting Point (C)   | 0.1862563 | 0.064266  | 2.90    | 0.0052  |
| InBoiling Point (C)   | 0.4241708 | 0.116419  | 3.64    | 0.0006  |
| IndG of form (kJ/mol) | -0.762641 | 0.181832  | -4.19   | <.0001  |
| InElectronegativity   | -0.099364 | 0.04816   | -2.06   | 0.0434  |
| InCharge              | 0.6325631 | 0.205055  | 3.08    | 0.0031  |

<sup>115</sup>In

**Summary of Fit**

|                            |          |
|----------------------------|----------|
| RSquare                    | 0.114684 |
| RSquare Adj                | 0.076605 |
| Root Mean Square Error     | 0.909199 |
| Mean of Response           | 2.421169 |
| Observations (or Sum Wgts) | 98       |

**Parameter Estimates**

| Term                            | Estimate  | Std Error | t Ratio | Prob> t |
|---------------------------------|-----------|-----------|---------|---------|
| Intercept                       | 2.8173903 | 0.569859  | 4.94    | <.0001  |
| InMass                          | 0.2084621 | 0.100262  | 2.08    | 0.0404  |
| In1st ionization potential (eV) | 0.2212009 | 0.102722  | 2.15    | 0.0339  |
| In2nd ionization potential (eV) | 0.1883601 | 0.080015  | 2.35    | 0.0207  |
| IndH of form (kJ/mol)           | -0.282084 | 0.11203   | -2.52   | 0.0135  |

<sup>120</sup>Sn

**Summary of Fit**

|                            |          |
|----------------------------|----------|
| RSquare                    | 0.391848 |
| RSquare Adj                | 0.358062 |
| Root Mean Square Error     | 0.345091 |
| Mean of Response           | 3.398837 |
| Observations (or Sum Wgts) | 96       |

**Parameter Estimates**

| Term                            | Estimate  | Std Error | t Ratio | Prob> t |
|---------------------------------|-----------|-----------|---------|---------|
| Intercept                       | 4.8807357 | 0.377147  | 12.94   | <.0001  |
| InMass                          | 0.0862998 | 0.041873  | 2.06    | 0.0422  |
| In2nd ionization potential (eV) | -0.199311 | 0.03376   | -5.90   | <.0001  |
| InMelting Point (C)             | -0.131724 | 0.033112  | -3.98   | 0.0001  |
| InBoiling Point (C)             | -0.111781 | 0.037239  | -3.00   | 0.0035  |
| InHeat Capacity (J/molK)        | 0.0819092 | 0.04264   | 1.92    | 0.0579  |

<sup>121</sup>Sb

**Summary of Fit**

|                            |          |
|----------------------------|----------|
| RSquare                    | 0.418843 |
| RSquare Adj                | 0.399684 |
| Root Mean Square Error     | 0.87537  |
| Mean of Response           | 2.186709 |
| Observations (or Sum Wgts) | 95       |

**Parameter Estimates**

| Term                     | Estimate  | Std Error | t Ratio | Prob> t |
|--------------------------|-----------|-----------|---------|---------|
| Intercept                | 4.9243535 | 0.538753  | 9.14    | <.0001  |
| InMelting Point (C)      | -0.541075 | 0.084451  | -6.41   | <.0001  |
| InHeat Capacity (J/molK) | -0.159864 | 0.081349  | -1.97   | 0.0524  |
| InElectronegativity      | -0.725146 | 0.143719  | -5.05   | <.0001  |

<sup>130</sup>Te

**Summary of Fit**

Supplementary Material (ESI) for Journal of Analytical Atomic Spectrometry  
 This journal is © The Royal Society of Chemistry 2008

RSquare 0.296488  
 RSquare Adj 0.274036  
 Root Mean Square Error 0.550238  
 Mean of Response 2.961254  
 Observations (or Sum Wgts) 98

**Parameter Estimates**

| Term                            | Estimate  | Std Error | t Ratio | Prob> t |
|---------------------------------|-----------|-----------|---------|---------|
| Intercept                       | 3.9750098 | 0.477917  | 8.32    | <.0001  |
| InMass                          | 0.2659428 | 0.071071  | 3.74    | 0.0003  |
| In2nd ionization potential (eV) | 0.0988108 | 0.038576  | 2.56    | 0.0120  |
| InBoiling Point (C)             | -0.292196 | 0.057417  | -5.09   | <.0001  |

<sup>133</sup>Cs

**Summary of Fit**

RSquare 0.321443  
 RSquare Adj 0.282446  
 Root Mean Square Error 1.051133  
 Mean of Response 2.041374  
 Observations (or Sum Wgts) 93

**Parameter Estimates**

| Term                            | Estimate  | Std Error | t Ratio | Prob> t |
|---------------------------------|-----------|-----------|---------|---------|
| Intercept                       | 4.8555311 | 1.232322  | 3.94    | 0.0002  |
| In1st ionization potential (eV) | -1.067908 | 0.467439  | -2.28   | 0.0248  |
| InBoiling Point (C)             | -0.432841 | 0.117276  | -3.69   | 0.0004  |
| InHeat Capacity (J/molK)        | 1.293084  | 0.437196  | 2.96    | 0.0040  |
| InElectronegativity             | 0.6852722 | 0.31228   | 2.19    | 0.0309  |
| InCharge                        | -0.575533 | 0.312893  | -1.84   | 0.0693  |

<sup>138</sup>Ba

**Summary of Fit**

RSquare 0.43121  
 RSquare Adj 0.393912  
 Root Mean Square Error 0.655015  
 Mean of Response 2.100654  
 Observations (or Sum Wgts) 66

**Parameter Estimates**

| Term                      | Estimate  | Std Error | t Ratio | Prob> t |
|---------------------------|-----------|-----------|---------|---------|
| Intercept                 | -5.063022 | 4.257766  | -1.19   | 0.2390  |
| InMelting Point (C)       | -0.189697 | 0.09081   | -2.09   | 0.0409  |
| InElectronegativity       | 0.667167  | 0.10678   | 6.25    | <.0001  |
| Inion mobility (C/Pa*s*A) | -0.295507 | 0.131332  | -2.25   | 0.0281  |
| InCharge                  | -0.610105 | 0.27305   | -2.23   | 0.0291  |

<sup>140</sup>Ce

**Summary of Fit**

RSquare 0.106171  
 RSquare Adj 0.077338  
 Root Mean Square Error 0.76848  
 Mean of Response 2.774885  
 Observations (or Sum Wgts) 97

**Parameter Estimates**

| Term                            | Estimate  | Std Error | t Ratio | Prob> t |
|---------------------------------|-----------|-----------|---------|---------|
| Intercept                       | 1.9567797 | 0.358592  | 5.46    | <.0001  |
| In2nd ionization potential (eV) | 0.37399   | 0.132481  | 2.82    | 0.0058  |
| InHeat Capacity (J/molK)        | -0.187317 | 0.085128  | -2.20   | 0.0303  |
| InElectronegativity             | -0.247574 | 0.131704  | -1.88   | 0.0633  |

<sup>152</sup>Sm



### Summary of Fit

RSquare 0.417108  
 RSquare Adj 0.383608  
 Root Mean Square Error 0.897001  
 Mean of Response 2.153776  
 Observations (or Sum Wgts) 93

#### Parameter Estimates

| Term                            | Estimate  | Std Error | t Ratio | Prob> t |
|---------------------------------|-----------|-----------|---------|---------|
| Intercept                       | 1.2660954 | 0.6394    | 1.98    | 0.0508  |
| InMass                          | 0.6222756 | 0.132339  | 4.70    | <.0001  |
| In2nd ionization potential (eV) | -0.34873  | 0.137132  | -2.54   | 0.0128  |
| InH of form (kJ/mol)            | -0.19585  | 0.075528  | -2.59   | 0.0112  |
| InS (J/Kmol)                    | 0.3006542 | 0.104771  | 2.87    | 0.0052  |
| InElectronegativity             | 0.4819404 | 0.152335  | 3.16    | 0.0021  |

### <sup>153</sup>Eu

#### Summary of Fit

RSquare 0.44948  
 RSquare Adj 0.419232  
 Root Mean Square Error 0.899837  
 Mean of Response 2.082279  
 Observations (or Sum Wgts) 97

#### Parameter Estimates

| Term                            | Estimate  | Std Error | t Ratio | Prob> t |
|---------------------------------|-----------|-----------|---------|---------|
| Intercept                       | 1.9662477 | 0.900985  | 2.18    | 0.0317  |
| InMass                          | 0.569364  | 0.136341  | 4.18    | <.0001  |
| In2nd ionization potential (eV) | -0.240078 | 0.131542  | -1.83   | 0.0713  |
| InMelting Point (C)             | -0.30177  | 0.099267  | -3.04   | 0.0031  |
| InS (J/Kmol)                    | 0.3171134 | 0.126734  | 2.50    | 0.0141  |
| InElectronegativity             | 0.4148502 | 0.14262   | 2.91    | 0.0046  |

### <sup>159</sup>Tb

#### Summary of Fit

RSquare 0.369677  
 RSquare Adj 0.342566  
 Root Mean Square Error 0.8555  
 Mean of Response 2.205393  
 Observations (or Sum Wgts) 98

#### Parameter Estimates

| Term                            | Estimate  | Std Error | t Ratio | Prob> t |
|---------------------------------|-----------|-----------|---------|---------|
| Intercept                       | -0.717608 | 0.757894  | -0.95   | 0.3462  |
| InMass                          | 0.4947864 | 0.151806  | 3.26    | 0.0016  |
| In2nd ionization potential (eV) | -0.44924  | 0.133367  | -3.37   | 0.0011  |
| InS (J/Kmol)                    | 0.6502757 | 0.222545  | 2.92    | 0.0044  |
| InElectronegativity             | 0.2808909 | 0.130198  | 2.16    | 0.0336  |

### <sup>166</sup>Er

#### Summary of Fit

RSquare 0.400535  
 RSquare Adj 0.342523  
 Root Mean Square Error 0.868721  
 Mean of Response 2.302872  
 Observations (or Sum Wgts) 69

#### Parameter Estimates

| Term                            | Estimate  | Std Error | t Ratio | Prob> t |
|---------------------------------|-----------|-----------|---------|---------|
| Intercept                       | -19.07119 | 6.980037  | -2.73   | 0.0082  |
| In2nd ionization potential (eV) | -0.327299 | 0.150943  | -2.17   | 0.0340  |
| InMelting Point (C)             | 0.176344  | 0.104644  | 1.69    | 0.0970  |
| InS (J/Kmol)                    | 0.564559  | 0.145984  | 3.87    | 0.0003  |
| InElectronegativity             | 0.6351287 | 0.191312  | 3.32    | 0.0015  |

Supplementary Material (ESI) for Journal of Analytical Atomic Spectrometry  
This journal is © The Royal Society of Chemistry 2008

| Term                      | Estimate  | Std Error | t Ratio | Prob> t |
|---------------------------|-----------|-----------|---------|---------|
| Inion mobility (C/Pa*s*A) | -0.619438 | 0.20806   | -2.98   | 0.0041  |
| InCharge                  | 0.6652427 | 0.362697  | 1.83    | 0.0714  |

<sup>178</sup>Hf

**Summary of Fit**

|                            |          |
|----------------------------|----------|
| RSquare                    | 0.48303  |
| RSquare Adj                | 0.452973 |
| Root Mean Square Error     | 0.707685 |
| Mean of Response           | 2.222725 |
| Observations (or Sum Wgts) | 92       |

**Parameter Estimates**

| Term                            | Estimate  | Std Error | t Ratio | Prob> t |
|---------------------------------|-----------|-----------|---------|---------|
| Intercept                       | 2.4002976 | 0.394094  | 6.09    | <.0001  |
| InMass                          | 0.1634774 | 0.08468   | 1.93    | 0.0568  |
| In2nd ionization potential (eV) | -0.216493 | 0.063298  | -3.42   | 0.0010  |
| InHeat Capacity (J/molK)        | -0.284509 | 0.076168  | -3.74   | 0.0003  |
| InS (J/Kmol)                    | 0.136379  | 0.073835  | 1.85    | 0.0682  |
| InElectronegativity             | 0.5622137 | 0.088092  | 6.38    | <.0001  |

<sup>184</sup>W

**Summary of Fit**

|                            |          |
|----------------------------|----------|
| RSquare                    | 0.579227 |
| RSquare Adj                | 0.550407 |
| Root Mean Square Error     | 0.589876 |
| Mean of Response           | 2.526861 |
| Observations (or Sum Wgts) | 79       |

**Parameter Estimates**

| Term                            | Estimate  | Std Error | t Ratio | Prob> t | VIF       |
|---------------------------------|-----------|-----------|---------|---------|-----------|
| Intercept                       | 16.004741 | 7.424802  | 2.16    | 0.0344  | .         |
| In2nd ionization potential (eV) | -0.290317 | 0.081076  | -3.58   | 0.0006  | 1.330315  |
| InMelting Point (C)             | 1.777266  | 0.241268  | 7.37    | <.0001  | 1.4725231 |
| InHeat Capacity (J/molK)        | -0.358821 | 0.078996  | -4.54   | <.0001  | 1.4359238 |
| Inion mobility (C/Pa*s*A)       | 0.8248213 | 0.243785  | 3.38    | 0.0012  | 4.01052   |
| InCharge                        | -1.137931 | 0.344475  | -3.30   | 0.0015  | 3.4814844 |

<sup>192</sup>Os

**Summary of Fit**

|                            |          |
|----------------------------|----------|
| RSquare                    | 0.345594 |
| RSquare Adj                | 0.307985 |
| Root Mean Square Error     | 0.528283 |
| Mean of Response           | 2.887681 |
| Observations (or Sum Wgts) | 93       |

**Parameter Estimates**

| Term                            | Estimate  | Std Error | t Ratio | Prob> t |
|---------------------------------|-----------|-----------|---------|---------|
| Intercept                       | 1.8022861 | 0.783205  | 2.30    | 0.0238  |
| InMass                          | 0.1740485 | 0.057873  | 3.01    | 0.0034  |
| In2nd ionization potential (eV) | -0.541505 | 0.213021  | -2.54   | 0.0128  |
| InHeat Capacity (J/molK)        | -0.264458 | 0.062685  | -4.22   | <.0001  |
| IndG of form (kJ/mol)           | 0.2911891 | 0.107935  | 2.70    | 0.0084  |
| InElectronegativity             | -0.128587 | 0.069418  | -1.85   | 0.0674  |

<sup>193</sup>Ir

**Summary of Fit**

|                            |          |
|----------------------------|----------|
| RSquare                    | 0.386835 |
| RSquare Adj                | 0.344254 |
| Root Mean Square Error     | 0.90206  |
| Mean of Response           | 2.25172  |
| Observations (or Sum Wgts) | 78       |

### Parameter Estimates

| Term                            | Estimate  | Std Error | t Ratio | Prob> t |
|---------------------------------|-----------|-----------|---------|---------|
| Intercept                       | 14.86452  | 6.419899  | 2.32    | 0.0234  |
| ln2nd ionization potential (eV) | -0.684921 | 0.385099  | -1.78   | 0.0795  |
| lnBoiling Point (C)             | 0.3461765 | 0.103834  | 3.33    | 0.0014  |
| lnHeat Capacity (J/molK)        | -0.460717 | 0.103819  | -4.44   | <.0001  |
| lnS (J/Kmol)                    | 0.4660109 | 0.14734   | 3.16    | 0.0023  |
| Inion mobility (C/Pa*s*A)       | 0.4609659 | 0.217158  | 2.12    | 0.0372  |

### <sup>195</sup>Pt

#### Summary of Fit

|                            |          |
|----------------------------|----------|
| RSquare                    | 0.148086 |
| RSquare Adj                | 0.120306 |
| Root Mean Square Error     | 1.060863 |
| Mean of Response           | 2.155825 |
| Observations (or Sum Wgts) | 96       |

#### Parameter Estimates

| Term                     | Estimate  | Std Error | t Ratio | Prob> t |
|--------------------------|-----------|-----------|---------|---------|
| Intercept                | -0.035678 | 0.787858  | -0.05   | 0.9640  |
| lnMass                   | 0.2607192 | 0.092331  | 2.82    | 0.0058  |
| lnHeat Capacity (J/molK) | -0.230924 | 0.102636  | -2.25   | 0.0268  |
| lnG of form (kJ/mol)     | 0.2207406 | 0.120468  | 1.83    | 0.0701  |

### <sup>197</sup>Au

#### Summary of Fit

|                            |          |
|----------------------------|----------|
| RSquare                    | 0.065736 |
| RSquare Adj                | 0.056004 |
| Root Mean Square Error     | 0.950041 |
| Mean of Response           | 2.582524 |
| Observations (or Sum Wgts) | 98       |

#### Parameter Estimates

| Term      | Estimate  | Std Error | t Ratio | Prob> t |
|-----------|-----------|-----------|---------|---------|
| Intercept | 1.8511919 | 0.297308  | 6.23    | <.0001  |
| lnMass    | 0.1920334 | 0.073888  | 2.60    | 0.0108  |

### <sup>202</sup>Hg

#### Summary of Fit

|                            |          |
|----------------------------|----------|
| RSquare                    | 0.262356 |
| RSquare Adj                | 0.227643 |
| Root Mean Square Error     | 0.781117 |
| Mean of Response           | 2.485437 |
| Observations (or Sum Wgts) | 90       |

#### Parameter Estimates

| Term                      | Estimate  | Std Error | t Ratio | Prob> t |
|---------------------------|-----------|-----------|---------|---------|
| Intercept                 | -12.38094 | 3.16784   | -3.91   | 0.0002  |
| lnMass                    | 0.1762799 | 0.088641  | 1.99    | 0.0500  |
| lnHeat Capacity (J/molK)  | 0.2318294 | 0.094787  | 2.45    | 0.0165  |
| lnElectronegativity       | 0.1792206 | 0.08485   | 2.11    | 0.0376  |
| Inion mobility (C/Pa*s*A) | -0.447867 | 0.099664  | -4.49   | <.0001  |

### <sup>205</sup>Tl

#### Summary of Fit

|                            |          |
|----------------------------|----------|
| RSquare                    | 0.298438 |
| RSquare Adj                | 0.275807 |
| Root Mean Square Error     | 0.855835 |
| Mean of Response           | 2.374408 |
| Observations (or Sum Wgts) | 97       |

#### Parameter Estimates

| Term | Estimate | Std Error | t Ratio | Prob> t |
|------|----------|-----------|---------|---------|
|------|----------|-----------|---------|---------|

Supplementary Material (ESI) for Journal of Analytical Atomic Spectrometry  
 This journal is © The Royal Society of Chemistry 2008

| Term                            | Estimate  | Std Error | t Ratio | Prob> t |
|---------------------------------|-----------|-----------|---------|---------|
| Intercept                       | 2.2341509 | 0.529054  | 4.22    | <.0001  |
| lnMass                          | 0.3952054 | 0.074035  | 5.34    | <.0001  |
| ln2nd ionization potential (eV) | 0.1426644 | 0.077592  | 1.84    | 0.0692  |
| lnMelting Point (C)             | -0.253233 | 0.070301  | -3.60   | 0.0005  |

<sup>208</sup>Pb

**Summary of Fit**

|                            |          |
|----------------------------|----------|
| RSquare                    | 0.113586 |
| RSquare Adj                | 0.104156 |
| Root Mean Square Error     | 0.583855 |
| Mean of Response           | 3.524778 |
| Observations (or Sum Wgts) | 96       |

**Parameter Estimates**

| Term                | Estimate  | Std Error | t Ratio | Prob> t |
|---------------------|-----------|-----------|---------|---------|
| Intercept           | 2.4628675 | 0.31172   | 7.90    | <.0001  |
| lnMelting Point (C) | 0.1653838 | 0.047652  | 3.47    | 0.0008  |

<sup>209</sup>Bi

**Summary of Fit**

|                            |          |
|----------------------------|----------|
| RSquare                    | 0.43334  |
| RSquare Adj                | 0.366109 |
| Root Mean Square Error     | 0.24952  |
| Mean of Response           | 3.287196 |
| Observations (or Sum Wgts) | 67       |

**Parameter Estimates**

| Term                            | Estimate  | Std Error | t Ratio | Prob> t |
|---------------------------------|-----------|-----------|---------|---------|
| Intercept                       | 1.0288561 | 1.283565  | 0.80    | 0.4260  |
| ln1st ionization potential (eV) | 0.0998902 | 0.039454  | 2.53    | 0.0140  |
| ln2nd ionization potential (eV) | -0.109972 | 0.026866  | -4.09   | 0.0001  |
| lnMelting Point (C)             | -0.103394 | 0.045079  | -2.29   | 0.0254  |
| lnHeat Capacity (J/molK)        | 0.1272989 | 0.039607  | 3.21    | 0.0021  |
| lnH of form (kJ/mol)            | 0.131109  | 0.03725   | 3.52    | 0.0008  |
| lnion mobility (C/Pa*s*A)       | -0.079839 | 0.038931  | -2.05   | 0.0447  |
| lnCharge                        | -0.396701 | 0.103571  | -3.83   | 0.0003  |

<sup>232</sup>Th

**Summary of Fit**

|                            |          |
|----------------------------|----------|
| RSquare                    | 0.253794 |
| RSquare Adj                | 0.221699 |
| Root Mean Square Error     | 0.602    |
| Mean of Response           | 2.889736 |
| Observations (or Sum Wgts) | 98       |

**Parameter Estimates**

| Term                            | Estimate  | Std Error | t Ratio | Prob> t |
|---------------------------------|-----------|-----------|---------|---------|
| Intercept                       | 2.9697839 | 0.400358  | 7.42    | <.0001  |
| ln1st ionization potential (eV) | -0.157685 | 0.067397  | -2.34   | 0.0214  |
| lnBoiling Point (C)             | -0.099798 | 0.053205  | -1.88   | 0.0638  |
| lnS (J/Kmol)                    | 0.1173096 | 0.060093  | 1.95    | 0.0539  |
| lnElectronegativity             | -0.233737 | 0.075214  | -3.11   | 0.0025  |

<sup>238</sup>U

**Summary of Fit**

|                            |          |
|----------------------------|----------|
| RSquare                    | 0.325316 |
| RSquare Adj                | 0.302574 |
| Root Mean Square Error     | 0.743054 |
| Mean of Response           | 2.381298 |
| Observations (or Sum Wgts) | 93       |

Supplementary Material (ESI) for Journal of Analytical Atomic Spectrometry  
This journal is © The Royal Society of Chemistry 2008

**Parameter Estimates**

| Term                            | Estimate  | Std Error | t Ratio | Prob> t |
|---------------------------------|-----------|-----------|---------|---------|
| Intercept                       | 2.5244849 | 0.371674  | 6.79    | <.0001  |
| ln2nd ionization potential (eV) | -0.270662 | 0.104137  | -2.60   | 0.0109  |
| lnS (J/Kmol)                    | 0.3834862 | 0.086236  | 4.45    | <.0001  |
| lnElectronegativity             | 0.4928469 | 0.121099  | 4.07    | 0.0001  |
